1  
2  
3  
4  
5  
6  
7  
8  
9  
10  
11  
12  
13  
14  
15  
16  
17  
18  
19  
20  
21  
22  
23  
24  
25  
26  
27  
28  
29  
30  
31

## Transsynaptic labeling and transcriptional control of zebrafish neural circuits

Cagney Coomer<sup>1</sup>, Daria Naumova<sup>1,2</sup>, Mustafa Talay<sup>3</sup>, Bence Zolyomi<sup>3</sup>, Nathaniel J. Snell<sup>3</sup>, Altar Sorkaç<sup>3</sup>,  
Jean-Michael Chanchu<sup>4</sup>, Ji Cheng<sup>1,2</sup>, Ivanna Roman<sup>5</sup>, Jennifer Li<sup>5</sup>, Drew Robson<sup>5</sup>, Gilad Barnea<sup>3</sup> and  
Marnie E. Halpern<sup>1,2,4\*</sup>

1. Department of Molecular and Systems Biology, Geisel School of Medicine at Dartmouth, Hanover NH
2. Department of Biology, Johns Hopkins University, Baltimore, MD
3. Robert J. and Nancy D. Carney Institute for Brain Science, Department of Neuroscience, Brown University, Providence RI
4. Department of Embryology, Carnegie Institution for Science, Baltimore MD
5. Max Planck Institute for Biological Cybernetics, Tübingen, Germany

\*Corresponding author

Dr. Marnie E. Halpern

Tel.: (603) 646-5251

E-mail: [marnie.e.halpern@dartmouth.edu](mailto:marnie.e.halpern@dartmouth.edu)

32 **Abstract**

33 Deciphering the connectome, the ensemble of synaptic connections that underlie brain function, is a  
34 central goal of neuroscience research. The *trans*-Tango genetic approach, initially developed for  
35 anterograde transsynaptic tracing in *Drosophila*, can be used to map connections between presynaptic and  
36 postsynaptic partners and to drive gene expression in target neurons. Here, we describe the successful  
37 adaptation of *trans*-Tango to visualize neural connections in a living vertebrate nervous system, that of  
38 the zebrafish. Connections were validated between synaptic partners in the larval retina and brain. Results  
39 were corroborated by functional experiments in which optogenetic activation of retinal ganglion cells  
40 elicited responses in neurons of the optic tectum, as measured by *trans*-Tango-dependent expression of a  
41 genetically encoded calcium indicator. Transsynaptic signaling through *trans*-Tango reveals predicted as  
42 well as previously undescribed synaptic connections, providing a valuable *in vivo* tool to monitor and  
43 interrogate neural circuits over time.

44

45 **Main**

46 Ever since the application of Golgi staining to the nervous system, neuroscientists have sought to  
47 understand the structural organization of the brain and its underlying neural connections (<sup>1</sup>). Labeling with  
48 dyes or fluorescent proteins, transsynaptic tracing through application of viruses and, more recently,  
49 reconstruction by serial electron microscopy (EM) have helped resolve aspects of the connectome in  
50 invertebrate and vertebrate models. Each approach has its benefits and limitations (<sup>2</sup>). For example,  
51 anterograde and retrograde viral tracers have been widely used to map neural connections in the mouse  
52 brain (<sup>3, 4, 5</sup>), but transduction of virus is variable in different cell types and inevitably causes death of  
53 infected neurons. The labor-intensive sample collection and computational complexity required for 3-D  
54 EM reconstruction, (<sup>2, 6</sup>), precludes surveying large brain regions or comparisons between samples.

55 Genetic methods for anterograde transsynaptic tracing permit precise labeling from identified  
56 presynaptic neuronal populations in multiple individuals and can be used to both identify synaptic  
57 partners and modify their activity. The genetically encoded synthetic transsynaptic labeling system,  
58 *trans*-Tango (<sup>7</sup>) has been successfully used to map a variety of neural circuits in *Drosophila* (<sup>8-12</sup>). The  
59 Tango system relies on a synthetic signaling pathway involving two fusion proteins that convert the  
60 activation of a receptor into reporter expression (<sup>13</sup>). To determine its effectiveness in a vertebrate central  
61 nervous system (CNS), we modified the components of *Drosophila trans*-Tango for anterograde  
62 transsynaptic labeling in zebrafish, a powerful vertebrate model for correlating whole brain imaging of  
63 neural activity with behavior.

64 Large numbers of zebrafish embryos can be readily injected at the 1-cell stage with plasmids  
65 bearing all *trans*-Tango components, and subsequent neuronal labeling assessed in the larval brain. Such  
66 transient assays enable a variety of constructs to be rapidly tested, compared, and optimized. The  
67 transparency of larval stages permits live confocal imaging of uniquely labeled pre- and postsynaptic  
68 neurons throughout the brain and connections can be followed over time. Notably, neuronal morphologies  
69 are distinguished at the single-cell level by sparse labeling resulting from mosaic expression of injected  
70 DNA constructs. Many transgenic tools are also already available that can be used in conjunction with the

71 *trans*-Tango reagents. As first described by Talay et al., (<sup>7</sup>), the *trans*-Tango approach relies on two  
72 binary transcriptional regulatory systems, Gal4/UAS from *Saccharomyces cerevisiae* and QF/QUAS from  
73 *Neurospora crassa* (Fig. 1a), that both function in zebrafish (<sup>14, 15</sup>). Adopting *trans*-Tango for zebrafish  
74 capitalizes on existing Gal4 lines to drive expression of a ligand derived from human glucagon (hGCG) in  
75 presynaptic neurons of interest. In this construct, hGCG is fused to the cytosolic and transmembrane  
76 domains of a zebrafish synaptic protein, either *neurexin 1a* or *1b*, and the extracellular domain of the  
77 *human intercellular cell adhesion molecule 1* (ICAM1). With these modifications, the ligand is tethered  
78 to the presynaptic membrane and extends into the synaptic cleft. The corresponding G-protein coupled  
79 glucagon receptor (hGCGR) is expressed on the surface of all neurons under control of a nearly pan-  
80 neural promoter. The cytoplasmic tail of the receptor is fused to the QF transcription factor via a  
81 sequence containing the cleavage site for the N1a protease from the tobacco etch virus (TEV) (<sup>13</sup>). Upon  
82 binding of the ligand across the synapse, the activated receptor recruits human b-arrestin2, which is  
83 specifically recruited to the activated G protein-coupled receptor and fused to the N1a protease tobacco  
84 etch virus (hArr-TEV). The resulting proteolytic cleavage and release of QF acts as switch in the  
85 postsynaptic neuron when it to translocate to the nucleus and activates transcription of any gene  
86 downstream of the multicopy upstream activating sequence (QUAS) to which it binds. As we  
87 demonstrate, different reporters can thus be placed under UAS and QUAS control to label pre- and  
88 postsynaptic neurons, respectively, with distinct fluorescent proteins. Additionally, target neurons can  
89 express any gene under QUAS control such as genetically encoded calcium indicators (i.e., GCaMP).

90

## 91 **Results**

### 92 Adaptation of *trans*-Tango components for zebrafish

93 To adapt the *trans*-Tango system for use in zebrafish, the ligand, receptor, and arrestin-TEV constructs  
94 were cloned into vectors containing the short flanking arms of the Tol2 transposon (<sup>16</sup>). The presence of  
95 each component was assessed by the addition of a secondary marker on the same plasmid, consisting of a

96 tissue-specific promoter driving expression of a fluorescent protein (Fig. 1b). Six ligand constructs that  
97 differed in the length of the ICAM1 extracellular domain and in zebrafish *neurexin1a* or *Ib* domains were  
98 placed under the control of a non-repetitive multicopy UAS sequence (4XnrUAS) <sup>(17)</sup> in a Tol2 plasmid  
99 that also contained the *crystalline, alpha A* promoter driving mCherry (*cryaa:mCherry*). For transcription  
100 of the hGCGR-QF and hArr-TEV constructs, we used the promoter from the zebrafish *ELAV like neuron-*  
101 *specific RNA binding protein 3 (elavl3)* gene that directs widespread expression in post-mitotic neurons  
102 throughout the larval zebrafish CNS <sup>(18)</sup>. The receptor and arrestin-TEV constructs were cloned into Tol2  
103 plasmids containing the promoter from the *hatching gland enzyme1.1 (hel.1)* gene <sup>(19)</sup> upstream of  
104 sequences encoding cyan or yellow fluorescent protein, respectively. The *hel.1* promoter drives  
105 expression in hatching gland cells at 24 hours post fertilization (hpf); however, labeling is not detected  
106 after 72 hpf. This permits imaging of neural connections in the larval brain unobscured by bright  
107 fluorescence from a secondary marker.

108

#### 109 Gal4-dependent anterograde labeling by *trans*-Tango

110 To assess the effectiveness of the individual ligand, receptor-QF, and arrestin-TEV constructs, we injected  
111 plasmids encoding each along with mRNA encoding Tol2 transposase into zebrafish embryos. Initially,  
112 embryos were derived from matings between *pt1fa:Gal4-VP16* driver <sup>(20)</sup> and *QUAS:mAppleCAAX*  
113 reporter lines. Initially, we used the *pancreas-specific transcription factor 1a (ptf1a)* driver because it  
114 promotes transcription broadly in the hindbrain <sup>(21-23)</sup>, as well as in retinal amacrine and horizontal cells  
115 and a subset of ganglion cells <sup>(24, 25)</sup>, providing a substantial target area for testing the functionality of  
116 *trans*-Tango. We determined which of six UAS:ligand constructs resulted in extensive labeling of  
117 putative postsynaptic neurons. Three constructs contained domains from the *neurexin 1a* gene and three  
118 from *neurexin 1b* (Supplementary Fig. 1) that, included in addition, either the full-length extracellular  
119 domain from ICAM1, a truncated version, or lacked these sequences altogether <sup>(7)</sup>. Criteria for  
120 determining the optimal ligand construct were mApple-CAAX reporter labeling that was robust,

121 consistent between samples, and Gal4-dependent. We co-expressed the receptor and arrestin-TEV  
122 constructs with each ligand configuration and determined that *UAS:sGCG-ICAM(1235)-nrxn1b* produced  
123 the most extensive mApple-CAAX labeling of target neurons with minimal Gal4-independent labeling  
124 (Supplementary Fig. 1). We, therefore, used this ligand construct for all subsequent experiments. In 89%  
125 of larvae (n=1,042) that were screened positive for *ptlfa:Gal4-VP16* and all three *trans*-Tango  
126 components, mApple-CAAX labeled neurons were found in close proximity to GFP-labeled presynaptic  
127 neurons throughout the hindbrain (Fig. 2a,a'). In addition, we observed labeling of putative postsynaptic  
128 neurons in the optic tectum, presumably because the *ptlfa* promoter is active in a subset of retinal  
129 ganglion cells (<sup>25</sup>) whose axonal projections terminate in this midbrain region.

130 To address the specificity of *trans*-Tango, we compared the location of mApple labeled neurons  
131 with those observed using two other Gal4 driver lines. Cis-regulatory sequences from the *tyrosine*  
132 *hydroxylase* (*th*) gene in *th:Gal4-VP16; UAS:GFP* direct expression in dopaminergic neurons throughout  
133 the larval CNS (<sup>26</sup>). Those from the *ISL LIM homeobox 2b* (*islet2b*) gene in *isl2b:Gal4* drive expression in  
134 retinal ganglion cells (<sup>27</sup>), as well as in Rohan-Beard sensory neurons, neurons in cranial ganglia, dorsal  
135 root ganglia, the anterior and posterior lateral line and populations in the brain (<sup>28-30</sup>). At the 1-cell stage,  
136 embryos derived from matings between fish bearing these Gal4 driver lines and a *UAS:GFP* transgene  
137 with fish from the *QUAS:mApple-CAAX* reporter line were injected with the *trans*-Tango ligand,  
138 receptor, and arrestin constructs. At 6 days post fertilization (dpf), each driver line produced a distinct  
139 pattern of mApple-CAAX labeled neurons and, in all cases, putative postsynaptic cells were located near  
140 GFP-labeled neurons or their processes (Figs. 2a,a', 2 b,b' and 2c,c'). mApple-CAAX labeled cells were  
141 not detected in larvae bearing all *trans*-Tango components except the ligand (Figs. 2d,e,f). These  
142 observations indicate that *trans*-Tango functions effectively in the zebrafish nervous system with a high  
143 signal-to-noise ratio and patterns of labeling determined by the presynaptic subpopulation that expresses  
144 the ligand .

145 We tested whether transsynaptic labeling could also be achieved with another nearly pan-neural  
146 promoter, that of the *Xenopus tubulin beta 2B class Iib* (*Xla.tubb2b*) gene, which drives expression in the  
147 zebrafish CNS from larval to adult stages. Injection of the receptor and arrestin-TEV constructs under  
148 *Xla.tubb2b* control together with the ligand plasmid and Tol2 RNA into embryos from matings between  
149 the *isl2b:Gal4* and *QUAS:mApple-CAAX* lines resulted in robust mApple-CAAX labeling as early as 1  
150 dpf, which increased as development proceeded (Fig. 3). Uniquely identified neurons were tracked over  
151 time, including commissural primary ascending (CoPA) interneurons, V2a interneurons, and primary  
152 motoneurons such as CaP that are all known post-synaptic targets of ligand-expressing Rohon-Beard cells  
153 (<sup>31,32</sup>). Labeling from the *Xla.tubb2b* driven constructs persisted, as mApple positive neurons present in  
154 the optic tectum at 6 dpf could still be detected in sections prepared from 2-week-old larvae  
155 (Supplemental Fig. 2a-b').

156

#### 157 Validation of anterograde labeling in the larval retina

158 The retina is a highly conserved structure that is populated by distinct neuronal cell types distinguished by  
159 their morphology, position and connectivity, making it an ideal substrate for testing the fidelity of *trans*-  
160 Tango. We identified a total of 102 cells individually labeled by mApple-CAAX in retinal samples from  
161 112 larvae that contained the *ptfla:Gal4* driver and *QUAS:mAppleCAAX* reporter transgenic lines and all  
162 *trans*-Tango plasmids. The *ptfla* gene is expressed in a retinal progenitor population that gives rise to all  
163 amacrine and horizontal cells (<sup>24</sup>). The postsynaptic partners of amacrine cells are retinal ganglion cells  
164 and bipolar cells as well as other amacrine cells, whereas horizontal cells form synapses with  
165 photoreceptors (<sup>33</sup>). Consistent with this, we detected mApple-CAAX labelled cells located in the  
166 ganglion cell layer with axons extending to the brain within the optic nerve (Fig. 4a,a'; n=20), in  
167 amacrine cells (Fig. 4b,b'; n=35) and bipolar cells (Fig. 4c,c'; Fig. n=25) in the inner nuclear layer, and  
168 photoreceptor cells (data not shown; n=57) in the photoreceptor layer.

169 To corroborate the identities of *trans*-Tango labeled neurons, we performed  
170 immunohistochemistry using cell-type specific antibodies and imaged double-labeled cells in cryosections

171 of 6 dpf larval retinas. mApple-CAAX labeled retinal ganglion cells co-labeled with HuC/D antibody  
172 were detected in close proximity to GFP-labeled presynaptic amacrine cells (n=8; Fig. 4a''). Amacrine  
173 cells situated in the inner nuclear layer with extensive dendritic processes in the inner plexiform layer also  
174 co-labeled with the HuC/D antibody (n=9; Fig. 4b'') and bipolar cells were distinguished by PKCa  
175 immunoreactivity (n=6; Fig. 4c''). These results indicate that *trans*-Tango reliably identifies known  
176 synaptic partners in the retina.

177

### 178 *trans*-Tango in stable transgenic lines

179 An advantage of plasmid injections is that diffuse labeling enables the identification of individual  
180 neurons; however, for some applications, labeling an entire neuronal sub-population is desired. To  
181 accomplish this, we established stable lines for each of the *trans*-Tango constructs. Plasmids were  
182 injected into 1-cell stage *QUAS:mApple-CAAX* embryos. Those with labeled hatching gland cells at 24  
183 hpf were raised to adulthood and their progeny screened to recover transgenic founders with germ-line  
184 clones. Founders were mated with *QUAS:mApple-CAAX* fish and their heterozygous progeny used to  
185 establish stable lines. Wholemount in situ hybridization (WISH) was performed at 6 dpf to verify  
186 transgene expression with RNA probes designed to capture unique sequences only found in the *trans*-  
187 Tango component (refer to Supplementary Fig. 3). For the ligand line *10xUAS-E1B:sGCG-ICAM(1235)-*  
188 *nrxn1b*, the probe detected transcripts in the same pattern as endogenous *ptfla* expression<sup>(25)</sup>, but not in  
189 the absence of the *ptlfa:Gal4-VPI6* transgene (Supplementary Fig 3a). The arrestin-TEV and receptor  
190 transgenes were broadly expressed throughout the CNS (Supplementary Figs. 3b,c) similar to endogenous  
191 *elavl3* transcripts<sup>(18)</sup>. Sibling embryos that lacked YFP labeling in the hatching gland at 1 dpf did not  
192 show any WISH signal as expected (Supplementary Fig. 3b,c).

193 To confirm that the stable ligand line functioned effectively at transsynaptic signaling, we mated the  
194 *ptlfa*-Gal4 driver line with F1 fish bearing *QUAS:mApple-CAAX* and *10xUAS-E1B:sGCG-ICAM(1235)-*  
195 *nrxn1b* and injected the receptor and arrestin-TEV constructs into their 1-cell stage embryonic progeny.



196 At 6 dpf, over 80% of larvae (n=257/312) displayed mApple-CAAX labeled postsynaptic neurons  
197 (Supplementary Fig. 3d-d’). We observed similar results with *elavl3:hArr-TEV* larvae that, as embryos,  
198 had been injected with the ligand and receptor plasmids (n=132/164; Supplementary Fig. 3e-e’). Only  
199 larvae from the receptor line, *elavl:hGCGR-TEVcs-QF*, failed to produce transsynaptic labeling following  
200 injection of the ligand and arrestin-TEV constructs. This is unlikely due to transgene position effects as  
201 experiments were performed on three independently established transgenic lines, whose larvae showed  
202 robust hGCGR-QF expression, but no mApple-CAAX labeled neurons (n= 0/276; data not shown).  
203 Moreover, mAppleCAAX neurons were not observed using a stable line for a receptor construct that was  
204 codon optimized for zebrafish (hGCGR\*) and fused to QF (n= 0/171; Supplementary Fig. 3f,f’,f’). All  
205 transgenic lines did produce functional receptor because robust mApple-CAAX labeling was observed at  
206 6 dpf after a subthreshold concentration of the receptor plasmid (Supplementary Fig. 3g,g’) was injected  
207 into *elavl:hGCGR\*-TEVcs-QF* embryos (n=21/25; Supplementary Fig. 3h,h’). along with the ligand and  
208 arrestin-TEV constructs.

209 We further examined transsynaptic labeling using the ligand and arrestin-TEV transgenic lines,  
210 either individually or together, with a different Gal4 driver, *isl2b:Gal4-VP*, in which individual neurons  
211 could be more easily resolved (Supplementary Fig. 4). Notably, on average, the number of mApple-  
212 CAAX labeled neurons was significantly greater (>5-fold) after the receptor was introduced into embryos  
213 doubly transgenic for both the ligand and arrestin-TEV (Supplementary Fig. 4d,d’ and f) compared to the  
214 number observed following injections of all *trans-Tango* plasmids (Supplementary Fig. 4a,a’) or  
215 injections into embryos with either the ligand (Supplementary Fig. 4b,b’) or arrestin-TEV transgene alone  
216 (Supplementary Fig. 4c,c’). Image registration of ten *isl2b:Gal4-VP; QUAS:mApple-CAAX* 6 dpf larvae  
217 bearing the ligand and arrestin-TEV transgenes and injected receptor plasmid revealed overlap in the  
218 location of *trans-Tango* labeled postsynaptic neurons (Supplementary Fig. 4g).

219

220 *trans-Tango* validates retinotectal circuitry

221 Calcium imaging and sparse labeling experiments suggest that tectal neurons with distinct morphologies  
222 are the targets of retinal ganglion cells (<sup>34,35</sup>). To test this connectivity directly, we used the *isl2b:Gal4-VP*  
223 driver line in fish containing *UAS:GFP* and *QUAS:mApple-CAAX* to express *trans*-Tango ligand  
224 selectively in retinal ganglion cells. We injected the ligand, receptor and arrestin-TEV constructs with  
225 Tol2 mRNA in 1-cell stage embryos, sorted out those having all secondary markers at 1 and 2 dpf, and  
226 then screened for *mAppleCAAX*-labeled tectal neurons at 6 dpf.

227         Seven neuronal subtypes previously proposed as postsynaptic to the optic tectum were uniquely  
228 identifiable on the basis of their position and shape (Fig. 5a-i'). These included non-stratified  
229 periventricular neurons (nsPVIN, n=46; Fig. 5b,b'), superficial interneurons (SIN, n=11; Fig. 5c,c'),  
230 mono-stratified periventricular neurons (msPVIN, n=67; Fig 5d,d'), bi-stratified periventricular  
231 interneurons (bsPVIN, n=43; Fig. 5e-e'), periventricular projection neurons (PVPN, n=21; Fig. 5f,f' and  
232 h,h') and tri-stratified periventricular interneurons (tsPVIN, n=72; Fig. 5g,g'). Using Fiji software, we  
233 produced renderings of individually identified cells (Fig 5j) whose morphology closely corresponded to  
234 the previously described tectal neurons (<sup>35,36</sup>).

235         Using *trans*-Tango, we were also able to identify a postsynaptic neuron that exhibited a  
236 previously undescribed morphology characterized by a long process in contact with the axon terminals of  
237 retinal ganglion cells and a cell body located in the hindbrain (n=6; Fig. 5k-k'). These data indicate that  
238 *trans*-Tango consistently labels predicted synaptic partners and is also a powerful tool for revealing  
239 unsuspected postsynaptic targets.

240

#### 241 Activation of synaptically-coupled neurons

242 To verify that the *trans*-Tango labeling correlates with functional synaptic connections, we  
243 optogenetically activated retinal ganglion cells in 6 dpf *isl2b:Gal4-VP* larvae and assessed the response in  
244 putative postsynaptic neurons in the optic tectum. Activity in post-synaptic cells was monitored with a  
245 nuclear-tagged genetically encoded calcium indicator (H2B-GCaMP6s; <sup>37</sup>) that we placed under QUAS

246 control. Receptor, arrestin-TEV and QUAS:H2B-GCaMP6s plasmids were injected into the 1-cell stage  
247 progeny of *isl2b:Gal4-VP; QUAS:mApple-CAAX* fish mated to the *10xUAS-E1B:sGCG-ICAM(1235)-*  
248 *nrxn1b* ligand line and later screened for secondary markers for all *trans*-Tango components. We first  
249 confirmed that GCaMP6s positive nuclei were only detected in mApple-CAAX neurons in the 6 dpf  
250 larval tectum (dashed boxes, Fig 6a-a''), indicating that both reporter genes were co-expressed through  
251 QF transcriptional regulation. Next, we activated retinal ganglion cells using the same Gal4 line to drive  
252 expression of the redshifted channel rhodopsin ReaChR under UAS control *UAS:ReaChR-Tag-RFPT*; <sup>38]</sup>  
253 and recorded the change in fluorescence ( $\Delta F/F$ ) of GCaMP6s positive tectal neurons following retinal  
254 exposure to a 561 nm laser. Individual neurons were imaged in the region of the tectum where axon  
255 terminals from retinal ganglion cells form a layered neuropil and connect to dendrites and axons of  
256 interneurons and projection neurons (<sup>35,39</sup>). We observed a significant increase in calcium transients in  
257 larvae containing *UAS:ReaChR-Tag-RFPT* compared to sibling larvae that lacked this transgene ( $p=$   
258 0.0048; Fig. 6b-d). Optogenetic activation of retinal ganglion cells, thus, leads to a response in tectal  
259 neurons that is visualized through GCaMP6s, the product of *trans*-Tango transsynaptic signaling.

260 Another demonstration of *trans*-Tango mediated gene regulation is the targeted ablation of  
261 postsynaptic neurons. We mated fish from the *ptf1a:Gal4* driver line containing the *QUAS:mApple-CAAX*  
262 reporter to a transgenic line that has an optimized version of the bacterial nitroreductase gene *nfsB* under  
263 QUAS control [*5xQUAS:GAP-tagYFP-P2A-NfsB\_Vv F70A/F108Y*; <sup>40]</sup>. At 5 dpf, larvae were imaged for  
264 *mApple-CAAX* labeling in the hindbrain (Fig. 6e,e') and then incubated for 24 hours in 10 mM of  
265 metronidazole, which when reduced is toxic to cells. Reimaging of the same hindbrain region revealed  
266 that *mApple-CAAX* neurons were no longer detected (Fig. 6f-f'). The results indicate that *trans*-Tango  
267 signaling can be used to identify, monitor, and disrupt neural circuits in the zebrafish brain.

268

269

270

271 **Discussion**

272 We established an anterograde transsynaptic labeling system, *trans*-Tango, for the zebrafish CNS. This is  
273 the first genetically encoded system for transsynaptic labeling in a vertebrate nervous system. We used  
274 *trans*-Tango to regulate the expression of transgenic reporters in the postsynaptic partners of genetically  
275 identified presynaptic neurons. These reporters can be used to trace connectivity anatomically and to  
276 identify postsynaptic partners of the starter neurons as well as monitor their activity or ablate them.

277 Functional investigations into neural pathways in zebrafish have been facilitated by optogenetic  
278 modulators and genetically encoded calcium indicators that report neuronal responses throughout the  
279 larval brain (<sup>41-43</sup>). However, genetic tools to validate synaptic connections directly have been lacking.  
280 Retrograde tracing of afferents using recombinant rabies, vesicular stomatitis, or herpes simplex 1 virus  
281 has been applied to the zebrafish CNS with some success (<sup>44, 45</sup>). However, drawbacks to viral approaches  
282 include the potential for neuronal toxicity, the necessity to inject recombinant virus locally into brain  
283 regions, and the maintenance of larval fish at higher than usual temperatures for effective expression.  
284 Unlike the available tools for circuit interrogation in zebrafish, the *trans*-Tango genetic strategy is solely  
285 based on the introduction of an optimized set of plasmids into 1-cell stage embryos. Hundreds of  
286 embryos can be readily injected, providing a large sample size for testing constructs. Moreover,  
287 concentration levels can be adjusted to recover broad or sparse labeling for assessing connectivity  
288 between neuronal populations or single synaptic partners, respectively. Expression of the *trans*-Tango  
289 ligand under UAS transcriptional control capitalizes on the large repertoire of neural-specific, transgenic  
290 Gal4 driver lines available in zebrafish (<sup>36, 46-50</sup>), while plasmid injections avoid the transcriptional  
291 silencing often associated with UAS-regulated transgenes in the zebrafish genome across generations (<sup>17,</sup>  
292 <sup>51, 52</sup>).

293 A major advantage of the *trans*-Tango approach is the ability to perform live imaging to monitor  
294 neural connections in the same individual over time, as was demonstrated for postsynaptic targets of *isl2b*  
295 neurons. With persistently expressing pan-neural promoters, *trans*-Tango can also be applied to examine

296 circuits in the juvenile and adult CNS. Ideally, performing analyses on adult brains will benefit from  
297 providing *trans*-Tango reagents as stable transgenes, as in *Drosophila* (<sup>7</sup>). Although we were successful at  
298 accomplishing this with transgenes for the ligand and arrestin-TEV components, we have not yet  
299 achieved *trans*-Tango labeling using several independently isolated receptor transgenic lines. Similar  
300 negative results were obtained when hGCGR or codon-optimized hGCGR\* constructs were driven by  
301 either the *elavl3* or *Xla.tubb2b* promoter. One explanation is that an insufficient number of receptors are  
302 concentrated at postsynaptic sites, owing to their distribution throughout the extensive membranes of  
303 neuronal processes. In support of this, individuals bearing four copies of receptor transgenes that had  
304 been injected with ligand and arrestin-TEV plasmids did not exhibit labeling of the postsynaptic reporter  
305 (data not shown). However, robust postsynaptic labeling was observed when a concentration of receptor  
306 plasmid, that is itself too low to mediate *trans*-Tango signaling, was injected into animals that had only  
307 one copy of the receptor transgene. These findings indicate that transgenic lines indeed produce  
308 functional hGCGR. We further determined that injection of the hGCGR-QF construct into embryos  
309 bearing both the ligand and arrestin transgenes, yielded significantly more labeled neurons compared to  
310 injections into each transgenic line individually. Experimental approaches requiring widespread  
311 transsynaptic signaling can therefore rely on receptors derived from plasmid injected into doubly  
312 transgenic animals homozygous for the ligand and arrestin-TEV transgenes.

313         Distinct patterns of labeling were obtained using three different Gal4 driver lines. In all cases,  
314 postsynaptic neurons demarcated by the QUAS-controlled membrane-tagged reporter were located in  
315 close proximity to neurons or their processes expressing the UAS-regulated reporter. Image registration  
316 also revealed an overlap in the positions of labeled cells between individual larvae from a given Gal4  
317 driver line. To assess the fidelity of connections between neurons, we turned to the retina where there is  
318 considerable information about the synaptic relationships between cell types (<sup>33</sup>). As expected, based on  
319 their position and immunolabeling, horizontal cells expressing ligand yielded *trans*-Tango labeling of  
320 bipolar cells, whereas ligand producing amacrine resulted in labeling of other amacrine cells or retinal  
321 ganglion cells. Ganglion cells are the only retinal neurons that project to the brain via the optic nerve,

322 where they terminate in discrete arborization fields in the optic tectum (<sup>53,54</sup>). Prior studies in several fish  
323 species revealed the stereotypic morphology of defined classes of tectal neurons from Golgi labeling,  
324 application of dyes, or calcium imaging of neural activity (<sup>34,35,55</sup>). Remarkably, by directing *trans*-Tango  
325 in retinal ganglion cells, we identified the same classes of neuronal subtypes that were previously reported  
326 in the tectum, supporting the validity of this genetic approach to confirm postsynaptic targets with high  
327 specificity. We also observed connectivity with a previously undescribed cell type that extends a long  
328 process from its cell body situated in the hindbrain. These findings further demonstrate the potential of  
329 *trans*-Tango to reveal new synaptic partners.

330 An important feature of a genetic, anterograde transsynaptic signaling pathway is the genetic  
331 access that it provides to postsynaptic neurons. With *trans*-Tango, expression is dependent on  
332 translocation of the QF transcription factor from the cell membrane to the nucleus where it promotes  
333 transcription of any gene under QUAS control, either from plasmids or genomic transgenes. Increasing  
334 numbers of QUAS driven reporter and effector transgenic lines are available in zebrafish (<sup>15,56-59</sup>) and all  
335 can be used as outputs of *trans*-Tango signaling. In addition to the membrane-tagged fluorescent  
336 reporter mApple-CAAX, we present functional evidence for activation of QUAS regulated genes  
337 encoding a nuclear GCaMP and a bacterial nitroreductase. Together, such *trans*-Tango dependent tools  
338 offer new ways to characterize synaptically-coupled neurons and evaluate how their activity within neural  
339 circuits underlies behavioral responses. Implementation in zebrafish of *retro*-Tango, a recently described  
340 Tango-based strategy for retrograde transsynaptic signaling (<sup>60</sup>), will further increase the versatility and  
341 power of genetic approaches to probe neural pathways both acutely and over time in a vertebrate brain.

342

## 343 **Methods**

### 344 Animals

345 Zebrafish were reared under a 14:10 light:dark cycle at 27°C in dechlorinated and filtered system water.

346 Transgenic lines for *trans*-Tango components were generated in the AB wild-type strain (<sup>61</sup>) including

347 two alleles of *Tg(10xUAS-E1B:sGCG-ICAM(1235)-nrxn1b; cryaa:mCherry)*<sup>cd28, cd29</sup> referred to as  
348 *(10xUAS-E1B:sGCG-ICAM(1235)-nrxn1b)*, four alleles of *Tg(elavl3:hGCCGR-TEVcs-QF; he1.1:CFP)*<sup>c796,</sup>  
349 <sup>c797, cd30, cd34</sup> *(elavl3:hGCCGR-TEVcs-QF)* and *Tg(elavl3:hArr-TEV)*<sup>cd30</sup> *(elavl3:hArr-TEV)*. The Gal4  
350 driver lines *TgBAC(pt1fa:Gal4-VP16; UAS:GFP)*<sup>h16</sup> *(pt1fa:Gal4-VP16; <sup>62</sup>)*, *Tg(th:Gal4-VP16;*  
351 *UAS:GFP)*<sup>m1233</sup> *(th:Gal4-VP16; <sup>63</sup>)* and *Tg(-17.6isl2b:Gal4-VP;myl7:RFP;UAS:GFP)*<sup>zc60</sup> *(isl2b:Gal4-*  
352 *VP; <sup>64</sup>)*. and QUAS regulated lines *Tg(QUAS:mApple-CAAX; he1.1:mCherry)*<sup>c636</sup> *(QUAS:mApple-CAAX;*  
353 *Choi et al., 2021)* and *Tg(5xQUAS:GAP-tagYFP-P2A-NfsB\_Vv F70A/F108Y,he:ECFP)*<sup>h562</sup>  
354 *(5xQUAS:GAP-tagYFP-P2A-NfsB\_Vv F70A/F108Y; <sup>40</sup>)* were also used in this study. To inhibit melanin  
355 pigmentation, embryos and larvae were maintained in system water containing 0.003% phenylthiourea  
356 (PTU; P7629, Sigma-Aldrich). All protocols and procedures were approved by the Institutional Animal  
357 Care and Use Committee (IACUC) of Dartmouth College

358

### 359 Plasmids

360 Plasmids for the *trans*-Tango components were generated using the Hi-Fi DNA Assembly (NEB  
361 #E5520S), BP Gateway Cloning (Thermo Fisher, Invitrogen #11789020) and LR Gateway Cloning  
362 (Thermo Fisher, Invitrogen #11791020) kits. Relevant PCR primers indicated below are listed in Table 1.  
363 All ligand constructs were generated in a similar manner. The plasmid pExpTol2-UAS-E1B-ReaChR-TS-  
364 tagRFP-cryaa-mCherry was generated as an intermediate construct. The cryaa-mCherry sequence was  
365 amplified from pTol2pA2-ubb:secHsa.ANNEXINV-mVenus, cryaa:RFP (addgene #92388) using primers  
366 3283 and 3284. The SV40 late polyA sequence was amplified from pKHR8 (addgene #74625) using  
367 primers 3285 and 3286. The pExpTol2-UAS-E1B-ReaChR-TS-tagRFP plasmid was digested with *AscI*  
368 and *MluI*. Both PCR products and the digested vector were assembled using Hi-Fi DNA Assembly to  
369 obtain pExpTol2-UAS-E1B-ReaChR-TS-tagRFP-cryaa-mCherry. For pExpTol2-UAS-E1B-sGCG-  
370 *Nrxn1a*; cryaa-mCherry, the sGCG sequence was amplified from the *Drosophila trans*-Tango plasmid (<sup>7</sup>)  
371 using primers 3274 and 3279. To create the pExpTol2-UAS-E1B-sGCG-ICAM(1235)-*Nrxn1a*; cryaa-  
372 mCherry vector, sGCG-ICAM(1235) sequences were amplified from the *Drosophila* plasmid (<sup>7</sup>) in two

373 separate reactions, using primer pairs 3274 and 2302 and 3275 and 2303. For pExpTol2-UAS-E1B-  
374 sGCG-ICAM-Nrxn1a; cryaa-mCherry the sGCG-ICAM sequence was amplified using the primers 3274  
375 and 3275. Nrxn1a sequence encoding the full-length protein without the signal peptide was amplified  
376 using primers 3280 and 3264. Sequences encoding the transmembrane and the intracellular domains of  
377 Nrxn1a were amplified using primers 3276 and 3264 from pooled cDNA of 6 dpf zebrafish larvae. PCR  
378 products were subsequently cloned pExpTol2-UAS-E1B-ReaChR-TS-tagRFP-cryaa-mCherry (Addgene  
379 #43963) digested with SpeI and PacI using Hi-Fi DNA Assembly.

380 Constructs for the Nrxn1b plasmids were generated as described above. For pExpTol2-UAS:E1B-sGCG,  
381 the sGCG sequence was amplified from the trans-Tango plasmid (<sup>7</sup>) using primers 3274 and 3281. To  
382 create pExpTol2-UAS-E1B-sGCG-ICAM(1235)-Nrxn1b; cryaa-mCherry, the sGCG-ICAM(1235)  
383 sequence was amplified from the trans-Tango plasmid (<sup>7</sup>) in two separate reactions using the primer pairs  
384 3274 and 2302 and 3277 and 2303. For pExpTol2-UAS-E1B-sGCG-ICAM-Nrxn1b; cryaa-mCherry, the  
385 sGCG-ICAM sequence was amplified from the *trans*-Tango plasmid (<sup>7</sup>) using primers 3274 and 3277.  
386 Nrxn1b sequence encoding full-length protein without the signal peptide was amplified from zebrafish  
387 cDNA using primers 3282 and 3265 and the transmembrane and the intracellular domains were amplified  
388 using primers 3278 and 3264. PCR products were subsequently cloned into pExpTol2-UAS-E1B-  
389 ReaChR-TS-tagRFP-cryaa-mCherry (Addgene #43963) digested with SpeI and PacI using Hi-Fi DNA  
390 Assembly.

391 To produce hGCGR vectors, myl7\_EGFP sequence was amplified from pDestTol2CG2-U6:gRNA  
392 (Addgene #63156) using primers 3266 and 3267. The SV40 late polyA sequence was amplified from  
393 pKHR8 (Addgene #74625 ) using primers 3268 and 3269. The Tol2 Gateway Destination Vector (<sup>41</sup>) was  
394 digested with AscI and MluI. Both PCR products and the digested vector were assembled using Hi-Fi  
395 DNA Assembly. The resulting plasmid was subsequently digested with SpeI and SacII. The hGCGR-  
396 TEVcs-QF sequence was amplified from the *Drosophila trans*-Tango plasmid (<sup>7</sup>) using primers 3270 and  
397 3271. The PCR product and the digested vector were assembled using Hi-Fi DNA Assembly. The final  
398 plasmid was then subjected to LR Gateway cloning with pEntry-HuC (<sup>41</sup>) to obtain elav13:hGCGR-



399 TEVcs-QF; myl7:EGFP. In later experiments, the secondary reporter labeling the heart (myl7:EGFP)  
400 was replaced with he1.1:CFP that labels hatching gland cells. The he1.1:CFP sequence was amplified  
401 from p3Ehe1a:ECFP (Addgene #113880) using primers 185 and 186.  
402 The receptor construct was also placed under the control of the Xla.Tubb2b promoter  
403 (Xla.Tubb2b:hGCGR-TEVcs-QF; he1.1:CFP). The hGCGR-TEVcs-QF sequence was amplified from  
404 elavl3:hGCGR-TEVcs-QF;myl7:EGFP using primers 93 and 131 that contained flanking attB1 and attB2  
405 sequences, respectively. A Gateway recombination reaction was performed using BP Clonase II with this  
406 PCR product and donor vector pDONR221 (Invitrogen, #12536017) to obtain pME\_hGCGR-TEVcs-QF.  
407 Using Gateway LR Clonase II, p5E nbt<sup>(56)</sup>, pME\_hGCGR-TEVcs-QF, p3E\_he1a:ECFP (Addgene  
408 #113880) were introduced into the Tol2 Gateway Destination Vector<sup>(65)</sup>;#394) to obtain  
409 Xla.Tubb2b:hGCGR-TEVcs-QF;he1.1:CFP.  
410 The hGCGR sequence from the elavl3:hGCGR-TEVcs-QF;myl7:EGFP (this study) was codon optimized  
411 for zebrafish (hGCGR\*) following  
412 <https://www.nichd.nih.gov/research/atNICHD/Investigators/burgess/software><sup>(66)</sup> and synthesized by  
413 Gene Universal ([www.geneuniversal.com](http://www.geneuniversal.com)) into pUC57-BsaI. From this plasmid, the hGCGR\* sequence  
414 was amplified and attB1 and attB2 arms attached using primers 174 and 175. The PCR product was  
415 placed in pME (pDONR221 #398, Addgene) using a Gateway recombination reaction with BP clonase II.  
416 Subsequently, Gateway reactions were used to introduce either p5E\_elavl3 or p5E\_nbt with  
417 pME\_hGCGR\*-TEVcs-QF and p3E\_he1a:ECFP (Addgene #113880) into the Tol2 Gateway Destination  
418 Vector<sup>(65)</sup>; #394) to produce elavl3:hGCGR\*-TEVcs-QF;he1.1:CFP or Xla.Tubb2b:hGCGR\*-TEVcs-  
419 QF;he1.1:CFP.  
420 For the arrestin construct elavl3:hArr-TEV;myl7:mCherry, the myl7:mCherry sequence was amplified  
421 from pKHR8 (Addgene #74625) using primers 3266 and 3267. The SV40 late polyA sequence was  
422 amplified from pKHR8 using primers 3268 and 3269. A Tol2 Gateway Destination Vector (Ahrens et al.,  
423 2012) was digested with AscI and MluI. Both PCR products and the digested vector were assembled  
424 using Hi-Fi DNA Assembly. The resulting plasmid was subsequently digested with SpeI and SacII. The

425 hArrestin2-TEV sequence was amplified from the trans-Tango plasmid <sup>(7)</sup> using primers 3272 and 3273.

426 The PCR product and the digested vector were assembled using Hi-Fi DNA Assembly. The final plasmid

427 was then subjected to LR Gateway cloning with pEntry-HuC <sup>(41)</sup> to obtain elavl3:hArr-TEV;

428 myl7:mCherry.

429 For replacement of the myl7:mCherry secondary reporter with he1.1:YFP, the elavl3:hArr-TEV sequence

430 were amplified from the elavl3:hArr-TEV; myl7:mCherry plasmid using primers 183 and 184. The

431 he1.1:YFP sequence was amplified from p3E\_he1a:eYFP (Addgene #113879) using primers 185 and

432 186. Both PCR products were assembled with the Tol2 Gateway plasmid backbone (pDestTol2pA2-

433 U6:gRNA; Addgene #63157) using Hi-Fi DNA Assembly to obtain elavl3:hArr-TEV;he1.1:YFP.

434 hArr-TEV was also placed under the control of Xla.Tubb2b by amplification of this sequence from

435 elavl3:hArr-TEV;myl7:mCherry using primers 203 and 51, with flanking attB1 and attB2 sequences,

436 respectively. A Gateway recombination reaction was performed using BP Clonase II with the PCR

437 product and donor vector pDONR221 (Invitrogen, #12536017) to obtain pME\_hArr-TEV. LR Clonase II

438 was used to recombine p5E\_nbt, pME\_hArr-TEV and p3E\_he1a:eYFP (Addgene #113879) into the Tol2

439 Gateway Destination Vector <sup>(65)</sup>; #394) to obtain Xla.Tubb2b:hArr-TEV;he1.1:YFP.

440 To generate the QUAS:H2B-GCaMP6s; he1.1:CFP plasmid, an H2B-GCaMP6s middle entry clone

441 was prepared from Addgene plasmid #59530 and subsequently recombined with p5E\_QUAS (Addgene,

442 #61374) and p3E\_he1a:ECFP (Addgene, #113880) into a Tol2 Destination Vector <sup>(65)</sup>; #394).

443

444

445

446

447

448 Table 1: Primers for synthesis of plasmids. PCR amplified components of plasmids are indicated by the  
 449 text in red.

450

| Component                                                                                                                      | Template                                           | Primer # | Orientation | Sequence                                                             |
|--------------------------------------------------------------------------------------------------------------------------------|----------------------------------------------------|----------|-------------|----------------------------------------------------------------------|
| hGCG-ICAM(1235)-Nrnx1a<br>hGCG-ICAM(1235)-Nrnx1b<br><br>hGCG-ICAM-Nrnx1a<br>hGCG-ICAM-Nrnx1b<br><br>hGCG-Nrnx1a<br>hGCG-Nrnx1b | <i>trans</i> -Tango plasmid<br>(Talay et a., 2017) | 3274     | Forward     | ACGAATTCCTGCAGCCCGGG<br>GGATCCGCGGCCGCCACCAT<br>GAGTGCACTTCTGATCCTAG |
| hGCG-ICAM(1235)-Nrnx1a<br>hGCG-ICAM(1235)-Nrnx1b                                                                               | <i>trans</i> -Tango plasmid<br>(Talay et a., 2017) | 2302     | Reverse     | TCTGCTGGCTTGGGAAGCTGT<br>AGATGGTCACGTC                               |
| hGCG-ICAM(1235)-Nrnx1a<br>hGCG-ICAM-Nrnx1a                                                                                     | <i>trans</i> -Tango plasmid<br>(Talay et a., 2017) | 3275     | Forward     | GCCTACGACCATGCCCTCATA<br>CCGGGGGGAGAG                                |
| hGCG-ICAM(1235)-Nrnx1a<br>hGCG-ICAM(1235)-Nrnx1b                                                                               | <i>trans</i> -Tango plasmid<br>(Talay et a., 2017) | 2303     | Reverse     | CAGCTTCCAAGCCAGCAGA<br>CCCC AATGTG                                   |
| hGCG-Nrnx1a                                                                                                                    | <i>trans</i> -Tango plasmid<br>(Talay et a., 2017) | 3279     | Reverse     | ACCAGTGA ACTCCATACTAGT<br>ATTCCC GTTACCATTGCC                        |
| hGCG-ICAM(1235)-Nrnx1b<br>hGCG-ICAM-Nrnx1b                                                                                     | <i>trans</i> -Tango plasmid<br>(Talay et a., 2017) | 3277     | Forward     | GCCCACCACCATCCCCTCATA<br>CCGGGGGGAGAG                                |

|                                                            |                                                            |      |         |                                                                                |
|------------------------------------------------------------|------------------------------------------------------------|------|---------|--------------------------------------------------------------------------------|
| hGCG-Nrxn1b                                                | <i>trans</i> -Tango plasmid<br>(Talay et al., 2017)        | 3281 | Forward | CCTGAGACTAGATCCACTAGT<br>ATTCCCCTTACCATTGCC                                    |
| hGCG-ICAM- Nrxn1b*                                         | UAS-E1B:hGCG-ICAM-<br>Nrxn1b;cryaa:mCherry<br>(this study) | 87   | Forward | GGGGACAAGTTTGTACAAAA<br>AAGCAGGCTCACCATGAGTG<br>CACTTCTGA                      |
| hGCG-ICAM- Nrxn1b*                                         | UAS-E1B:hGCG-ICAM-<br>Nrxn1b;cryaa:mCherry<br>(this study) | 88   | reverse | GGGGACCACTTTGTACAAGA<br>AAGCTGGGTAAAAAACCTCC<br>CACACCTC                       |
| hGCG-ICAM(1235)-Nrxn1a<br>hGCG-ICAM-Nrxn1a                 | 6 dpf zebrafish cDNA                                       | 3276 | Forward | TCCCCCGGTATGAGGGCATG<br>GTCGTAGGCATCGTTGCAG                                    |
| hGCG-ICAM(1235)-Nrxn1a<br>hGCG-ICAM-Nrxn1a<br>hGCG-Nrxn1a  | 6 dpf zebrafish cDNA                                       | 3264 | Reverse | TTAATTCGAGCTCCACCGCGG<br>TGGCTTAATTAATCAGACGTA<br>GTACTCCTTGCTTGTCTTT<br>TT    |
| hGCG-ICAM(1235)-Nrxn1b<br>hGCG-ICAM-Nrxn1b                 | cDNA                                                       | 3278 | Forward | TCCCCCGGTATGAGGGGATG<br>GTGGTGGGCATCGTGCGG                                     |
| hGCG-ICAM(1235)- Nrxn1b<br>hGCG-ICAM-Nrxn1b<br>hGCG-Nrxn1b | cDNA                                                       | 3265 | Reverse | TTAATTCGAGCTCCACCGCGG<br>TGGCTTAATTAATCAGACGTA<br>ATACTCCTGTTTTTGTCTTC<br>TTGC |
| hGCG-Nrxn1a                                                | cDNA                                                       | 3280 | Forward | AACGGGAATACTAGTATGGA<br>GTTCACTGGTGCAGAAGGCC<br>AG                             |
| hGCG-Nrxn1b                                                | cDNA                                                       | 3282 | Forward | AACGGGAATACTAGTGGATC<br>TAGTCTCAGGTTTACAGGATC<br>CGAC                          |

|                           |                                                                                              |      |         |                                                                      |
|---------------------------|----------------------------------------------------------------------------------------------|------|---------|----------------------------------------------------------------------|
| hGCGR-TEVcs-QF            | <i>trans</i> -Tango plasmid<br>(Talay et a., 2017)                                           | 3270 | Forward | CGTTCAGCTTTCTTGACAAA<br>GTGGTCACTAGTCACCATGCC<br>CCCCTGCCAGCCACAGCG  |
| hGCGR-TEVcs-QF            | <i>trans</i> -Tango plasmid<br>(Talay et a., 2017)                                           | 3271 | Reverse | CGATGAATTAATTCGAGCTCC<br>ACCGCGGGACGTCCTATTGCT<br>CATACGTGTTGATATCGC |
| elavl3:hGCGR-TEVcs-QF     | elavl3:hGCGR-TEVcs-<br>QF;myl7:EGFP<br>(this study)                                          | 183  | Forward | ACGCGTGATCTGCGAAGATA<br>C                                            |
| elavl3:hGCGR-TEVcs-QF     | elavl3:hGCGR-TEVcs-<br>QF;myl7:EGFP<br>(this study)                                          | 184  | Reverse | GGCGCGCCTGAATGATCAG                                                  |
| elavl3:hGCGR*-TEVcs-QF    | elavl3:hGCGR-TEVcs-<br>QF;myl7:EGFP<br>(this study)                                          | 174  | Forward | GGGGACAAGTTTGTACAAAA<br>AAGCAGGCTGCCACCATGCC<br>ACCTTGTC             |
| elavl3:hGCGR*-TEVcs-QF    | elavl3:hGCGR-TEVcs-QF;<br>myl7:EGFP<br>(this study)                                          | 175  | Reverse | GGGGACCACTTGTACAAGA<br>AAGCTGGGTAAAAAACCTCC<br>CACACCTCCCC           |
| Xla.Tubb2b:hGCGR-TEVcs-QF | elavl3:hGCGR-TEVcs-QF;<br>myl7:EGFP (this study)<br>p5E_Xla.Tubb2b (gift from Paul<br>Krieg) | 93   | Forward | GGGGACAAGTTTGTACAAAA<br>AAGCAGGCTATGCCCCCTGC<br>CAGC                 |
| Xla.Tubb2b:hGCGR-TEVcs-QF | elavl3:hGCGR-TEVcs-QF;<br>myl7:EGFP (this study)<br>p5E_Xla.Tubb2b (gift from Paul<br>Krieg) | 131  | Reverse | GGGGACCACTTGTACAAGA<br>AAGCTGGGTGCGCCTGAATG<br>ATCAGATT              |
| hArrestin2-TEV            | <i>trans</i> -Tango plasmid<br>(Talay et a., 2017)                                           | 3272 | Forward | CTCGTTCAGCTTTCTTGACA<br>AAGTGGTCACTAGTCACCATG<br>GGGGAGAAACCCGGGAC   |

|                 |                                                                        |      |         |                                                                     |
|-----------------|------------------------------------------------------------------------|------|---------|---------------------------------------------------------------------|
| hArrestin2-TEV  | <i>trans</i> -Tango plasmid<br>(Talay et al., 2017)                    | 3273 | Reverse | CGATGAATTAATTCGAGCTCC<br>ACCGCGGTCACGAGTACACC<br>AATTCATTCATGAGTTG  |
| elavl3:hArr-TEV | elavl3:hArr-TEV;myl7:mCherry<br>(this study)                           | 183  | Forward | ACGCGTGATCTGCGAAGATA<br>C                                           |
| elavl3:hArr-TEV | elavl3:hArr-TEV;myl7:mCherry<br>(this study)                           | 184  | Reverse | GGCGCGCCTGAATGATCAG                                                 |
| elavl3_EGFP     | pDestTol2CG2-U6:gRNA<br>(Addgene #63156)                               | 3266 | Forward | TCTAGATCAGATCTAATCTGA<br>TCATTCAGGCGCGCCAAATCA<br>GTTGTGTAAATAAGAG  |
| elavl3_EGFP     | pDestTol2CG2-U6:gRNA<br>(Addgene #63156)                               | 3267 | Reverse | ATCTTATCATGTCTGTACTT<br>GTACAGCTCGTC                                |
| SV40 late polyA | pKHR8                                                                  | 3268 | Forward | GAGCTGTACAAGTAACAGAC<br>ATGATAAGATACATTGATG                         |
| SV40 late polyA | pKHR8                                                                  | 3269 | Reverse | GAGCACCCGTGGCCGTATCTT<br>CGCAGATCACGCGTAAAAAA<br>CCTCCCACACCTC      |
| cryaa:mCherry   | pTol2pA2ubb:secHsa.ANNEXINV<br>-mVenus, cryaa: RFP (Addgene<br>#92388) | 3283 | Forward | CTAGATCAGATCTAATCTGAT<br>CATTTCAGGCGGCCATACAAT<br>ACATTTCTACAATAATG |
| cryaa:mCherry   | pTol2pA2ubb:secHsa.ANNEXINV<br>-mVenus, cryaa: RFP (Addgene<br>#92388) | 3284 | Reverse | ATCTTATCATGTCTGTACTT<br>GTACAGCTCGTC                                |
| he1.1:CFP       | p3E_he1a:ECFP                                                          | 185  | Forward | TCTGATCATTTCAGGCGGCCT<br>CAACCACTCCAGGCATAG                         |

|                 |                        |     |         |                                                          |
|-----------------|------------------------|-----|---------|----------------------------------------------------------|
| he1.1:CFP       | p3E_he1a:ECFP          | 186 | Reverse | TATCTTCGCAGATCACGCGTC<br>CATAGAGCCCACCGCATC              |
| p5E_QUAS        | Addgene, #61374        |     |         |                                                          |
| pME_H2B-GCaMP6s | Addgene plasmid #59530 |     | Forward | GGGGACAAGTTTGTACAAAA<br>AAGCAGGCTATGCCAGAGCC<br>AGCGAAG  |
| pME_H2B-GCaMP6s | Addgene plasmid #59530 |     | Reverse | GGGGACCACTTGTACAAGA<br>AAGCTGGGTAAAAAACCTCC<br>CACACCTCC |
| p3E_he1a:ECFP   | Addgene, #113880       |     |         |                                                          |

451

452 Microinjection

453 Progeny from matings between Gal4 driver lines and the *Tg(QUAS:mApple-CAAX; he1.1:mCherry)<sup>c636</sup>*  
454 reporter line were microinjected at the 1-cell stage with plasmids for all *trans*-Tango components  
455 (10xUAS-E1B:sGCG-ICAM-(1235)Nr1b; cryaa:mCherry, *elavl3-hArr-TEV*; *he1.1:eYFP*, *elavl3-*  
456 *hGCGR-TEVcs-QF*; *he1.1:CFP*) together with Tol2 transposase mRNA (25 ng/μl). Tol2 transposase  
457 mRNA was produced by digesting pCS-zT2TP<sup>(67)</sup> with *NotI* and using the mMACHINE  
458 SP6 Transcription kit (AM1340, Thermo Fisher Scientific) followed by phenol/chloroform-isoamyl  
459 extraction. Ligand and arrestin constructs (25 ng/μl) and the receptor construct (10 ng/ μl or 25 ng/μl or  
460 125 ng/μl) were pooled in a 5 μl injection mixture with water and phenol red (.2%). At 24 hpf, injected  
461 embryos were transferred to 0.003% PTU and system water and screened under an Olympus MVX10  
462 Macro Zoom fluorescence microscope for labeling of hatching gland cells. Embryos positive for YFP,

463 CFP, and mCherry labeled hatching gland cells were reared to 4 dpf, then screened for mCherry labeling  
464 of the lens and the presence of the UAS:GFP reporter. At 6 dpf, larvae were screened on the Olympus  
465 microscope for mApple-CAAX labeling in the CNS. Those that were positive were individually mounted  
466 in 1% low melting point agarose (50100, Lonza) and imaged on a Zeiss LSM 980 confocal microscope  
467 using a 20x (NA=0.5) water immersion lens.  
468 using a Leica DFC500 camera mounted on a Zeiss Axioskop.

469

#### 470 Whole mount in situ hybridization

471 Embryos from transgenic lines were presorted for labeling of appropriate secondary markers (refer to Fig.  
472 1b) and, at 6 dpf, larvae were fixed in 4% paraformaldehyde (PFA; Sigma-Aldrich) in 1X phosphate-  
473 buffered saline (PBS) at 4°C overnight and then dehydrated with methanol. To generate probes, primers  
474 amplifying a 200-500 bp stretch of DNA sequence corresponding to each *trans*-Tango component were  
475 designed using Primer3 software (<https://primer3.org/>). The location, size of DNA template, and primer  
476 sequences for the ligand, receptor and Arrestin transgenes are provided in Table 2. The *trans*-Tango  
477 plasmids were used as templates to generate PCR products, which were purified using a PCR cleanup kit  
478 (QIAGEN QIAquick PCR purification kit #28104). Reverse primers included a promoter for in vitro  
479 transcription using SP6 RNA polymerase (Roche RPOLSP6RO) with incorporation of UTP-digoxigenin  
480 (Roche 11093274910). RNA was purified using G-50 columns (Cytiva 27533001) and diluted to 30  
481 ng/ml. Larvae were rehydrated in PBS, permeabilized using Proteinase K (Roche 03115828001), post-  
482 fixed in 4% PFA, and hybridized in 50% formamide containing 30 ng of the RNA probe at 70°C. Probes  
483 were detected using alkaline phosphate-conjugated digoxigenin antibody (Sigma Aldrich 11093274910)  
484 and visualized after incubation with substrate solution containing NBT (4-nitro blue tetrazolium, Roche  
485 11383213001) and BCIP (5-bromo-4-chloro-3-indolyl-phosphate, Roche 11383221001). Larvae were  
486 mounted in 100% glycerol under coverslips and bright-field images captured using a Leica DFC500  
487 camera mounted on a Zeiss Axioskop

488



489 Table 2: Primers for synthesis of probes for RNA in situ hybridization

| Construct | Location of DNA template | Primer sequences                                 | Size   |
|-----------|--------------------------|--------------------------------------------------|--------|
| Ligand    | GCG/linker/ICAM          | CATTCACAGGGCACATTCAC                             | 322 bp |
| Ligand    | GCG/linker/ICAM          | GTTTCAATTTAGGTGACACTATAGGGGTCTC<br>TATGCCCAACAAC | 322 bp |
| Receptor  | QF                       | GTTTCGAAACGCCAGAGAGTC                            | 475 bp |
| Receptor  | QF                       | GTTTCAATTTAGGTGACACTATAGGCCGAGA<br>AAGTCAAGTGAGG | 475 bp |
| Arrestin  | hArr-TEV junction        | TCCCTTCATCTGATGGCATA                             | 312 bp |
| Arrestin  | hArr-TEV junction        | GTTTCAATTTAGGTGACACTATAGTCATGAG<br>TTGAGTCGCTTCT | 312 bp |
|           | Sp6                      | GTTTCAATTTAGGTGACACTATAG                         |        |

490

491 Immunofluorescence

492

493 Larvae were raised to 6 dpf in 0.003% PTU in system water, anesthetized using tricaine (0.02%, Sigma  
494 Aldrich E10521), and fixed in 4% paraformaldehyde overnight at 4°C. They were cryoprotected at 4°C  
495 overnight, first in 10% sucrose and then in 30% sucrose. Specimens were individually mounted nosedown  
496 in optimal cutting temperature (OCT) compound in plastic molds and frozen at -80°C. Sections (25 µm)  
497 were prepared on a HM525 NX Cryostat (Epremedia), layered onto Superfrost Plus slides (Fisher Scientific),  
498 and dried overnight in the dark at room temperature. Subsequently, sections were post-fixed in 1%  
499 paraformaldehyde, washed 3 times each in PBS and PBST, and incubated in blocking solution containing  
500 PBST and 1% bovine serum albumin at room temperature for 1 hour. The sections were then incubated  
501 overnight at 4°C in primary antibody diluted in blocking solution with 5% normal goat serum (Abcam,  
502 ab7481). Antibodies were directed against GFP (Abcam, ab13970, 1:500), HuC/D (Thermo Fisher  
503 Scientific, A-21271, 1:40), PKCa (Santa Cruz Biotechnologies, sc-17769, 1:100) and zpr-3 (ZIRC,

504 1:100). Following three washes in PBST, sections were incubated at room temperature for 1 hour with  
505 either goat anti-mouse Alexa Fluor 647 (Thermo Fisher Scientific, a32728) or goat anti-chicken Alexa  
506 Fluor 488 (Thermo Fisher Scientific, a11039) secondary antibody diluted 1:1000 in PBST: Slides were  
507 washed in PBST, incubated 10 minutes with DAPI stain (1:1000 in PBS, Sigma Aldrich D9542-10MG),  
508 and washed in PBS before incubation in 10% glycerol overnight at 4°C. Sections were covered in 30%  
509 glycerol for at least one hour at room temperature before mounting in 40% glycerol.

510

### 511 Confocal imaging

512 Larvae were anesthetized with 0.02% ethyl 3-aminobenzoate methanesulfonate salt (Tricane, (E10521,  
513 Ethyl 3-aminobenzoate methanesulfonate) and mounted in 1% low melting point agarose (50100, Lonza)  
514 in a 60 mm x 15 mm petri dish. Once solidified, system water containing PTU (0.003%) and Tricaine  
515 (0.02 %) was added to cover the agarose. Larvae were imaged using a Zeiss LSM 980 with Airyscan 2  
516 under a 20X (NA 0.8) water immersion objective. Images were taken in Z-stacks and processed using Fiji  
517 software. For tracing the morphology of individual neurons labeled by *trans*Tango transsynaptic  
518 signaling, 3D renderings were also performed using Fiji (<sup>68</sup>). Image files were extracted using *File ->*  
519 *Split channels -> image -> adjust -> threshold -> invert -> save as -> Tiff*.

520

### 521 Image registration

522 Confocal images of zebrafish larval brains were captured in two channels, one for the reference brain  
523 (GFP) and one for *trans*-Tango labeling (mApple). The reference larva was select based on orientation,  
524 straightness of head and lack of tilting and all other datasets (larvae) were registered to the reference  
525 channel (*ptf1a/islet2b*) of the reference larva using ANTs (Advanced Normalization Tools). We  
526 applied the code from Marquart et al. (<sup>69</sup>) with minor modifications to streamline the computation.  
527 Computation was performed using the high-performance computer cluster managed by Research  
528 Computing at Dartmouth College.

529

```
530 antsRegistration --dimensionality 3 --verbose 1 --float 1 -o
531 [${file//01.nrrd/01_},${file//01.nrrd/01_warped.nrrd}] --use-histogram-matching 0 --interpolation
532 WelchWindowedSinc --initial-moving-transform [${refbrain//01.nrrd/01.nrrd},${file//01.nrrd/01.nrrd},1]
533 -t rigid[0.1] --metric MI[${refbrain//01.nrrd/01.nrrd},${file//01.nrrd/01.nrrd},1,32,Regular,0.25] -c
534 [200x200x200x0,1e-8,10] --shrink-factors 12x8x4x2 -s 4x3x2x1vox -t Affine[0.1] --metric
535 MI[${refbrain//01.nrrd/01.nrrd},${file//01.nrrd/01.nrrd},1,32,Regular,0.25] --convergence
536 [200x200x200x0,1e-8,10] --shrink-factors 12x8x4x2 -s 4x3x2x1vox -t SyN[0.05,6,0.5] --metric
537 MI[${refbrain//01.nrrd/01.nrrd},${file//01.nrrd/01.nrrd},1,32,Regular,0.25] --convergence
538 [200x200x200x200x10,1e-7,10] --shrink-factors 12x8x4x2x1 -s 4x3x2x1x0vox;
539
540 antsApplyTransforms --dimensionality 3 --float 1 -v 0 -n WelchWindowedSinc -i ${file//01.nrrd/02.nrrd}
541 -r ${refbrain//01.nrrd/02.nrrd} -o ${file//01.nrrd/02_warped.nrrd} -t ${file//01.nrrd/01_1Warp.nii.gz} -t
542 ${file//01.nrrd/01_0GenericAffine.mat};
```

543  
544

545 To compare *trans*-Tango labeling between different datasets, we devised an algorithm to assign a unique  
546 color to the neurons of individual larvae by dividing the spectra from violet to red (0-360 degrees) with  
547 the number of individuals (n) in the Hue, Saturation, Lightness (HSV) color system. The registered CNS  
548 labeling for each larva was then plotted in a single image stack.

549

### 550 Optogenetics and calcium imaging

551 Embryos from *Tg(-17.6isl2b:Gal4-VP;myl7:RFP;UAS:GFP)<sup>zc60</sup>; Tg(UAS:ReaChR-Tag-RFPT)<sup>if50</sup>*  
552 intercrosses were injected with the QUAS:Hsa.H2B-GCaMP6s; he1.1:CFP plasmid along with the  
553 *trans*Tango ligand, receptor, arrestin plasmids at the 1-cell stage. Larvae containing all secondary  
554 markers were allowed to develop to 6 dpf, at which time they were paralyzed by a 1 min immersion in  $\alpha$ -  
555 bungarotoxin (20  $\mu$ l of 1 mg/ml solution in system water, B1601, ThermoFisher Scientific) and flushed  
556 with fresh system water. Individual larvae were mounted in a droplet of 1% low melting agarose (50100,  
557 Lonza) in the middle of a 60 mm x 15 mm Petri dish and immersed in system water after the agar  
558 solidified. For calcium imaging experiments, the xyt acquisition mode was used to capture images using a  
559 20X (NA=0.5) water image objective on a Zeiss LSM 980. Images containing the optic tectum in the field  
560 of view were acquired with the 488 nm laser at 310 x 310-pixel resolution and a rate of 2.6 Hz while

561 stimulating the left or right retina with 561 nm light. Calcium transients were recorded in a series of 200  
562 frames prior to retinal activation, 20 frames during activation with the 561 nm laser, and 150 frames  
563 following activation.

564 Image files were extracted in Fiji using *File -> Save as -> Image Sequence Files*. Frames were  
565 imported to MATLAB (Mathworks Inc.), and mean fluorescence intensities for individual regions of  
566 interest (ROI; areas adjacent to the left and right optic tectum) were calculated. For each larva, a  
567 highcontrast image was generated by calculating a maximum intensity projection for the series of images  
568 generated in Fiji. ROIs were drawn manually using the MATLAB *roipoly* function and the mean  
569 fluorescence intensity of pixels within each ROI was calculated. The change in fluorescence ( $\Delta F/F$ ) was  
570 calculated according to the following formula

$$F \leftarrow \frac{F_i - F_{min}}{F_{max} - F_{min}}$$

571  
572 where  $F_i$  represents the mean fluorescence intensity in an ROI at each time point, and  $F_{max}$  and  $F_{min}$  are the  
573 maximum and minimum fluorescence values, respectively, for that ROI during the recording period. To  
574 calculate total activity for each larva before and after activation, the  $\Delta F/F$  was averaged across the ROIs  
575 of each larva and total activity was obtained for a period by calculating the area under the curve using the  
576 MATLAB *trapz* function.

577

578

579 **Acknowledgements**

580 We thank Misha Ahrens, Tammy Kaminy, Kristen Kwan, Tim Mulligan and Jeff Mumm for sharing  
581 reagents and transgenic lines. We are grateful to Eric Horstick for advice on codon optimization and to  
582 Emma Spikol and Ahmed Abdelfattah for expert guidance on calcium imaging experiments. Special  
583 thanks are extended to Pat Robison for microscopy support and Bethany Malskis and Jaden Devine-  
584 Brilliant for animal care. This work was supported by a Hanna H. Gray fellowship to CEC and  
585 RF1MH123213 from the NIH Brain Initiative to MEH, GB, JL and DR.

586

587

588

589

590

591

592

593

594 **Figure Legends**

595 Fig. 1: *trans*-Tango mediates transsynaptic signaling in zebrafish

596 (a) Gal4 driver lines direct ligand expression in presynaptic neurons of interest. Ligand derived from  
597 human glucagon (sGCG) is tethered to the presynaptic membrane through the transmembrane domain  
598 of zebrafish Nrnx1b and extended into the synaptic cleft through the ICAM(1235) linker sequence  
599 (Talay et al., 2017). The receptor (hGCGR) is fused to the QF transcription factor through the  
600 protease cleavage site (cs) of the N1a protease from the tobacco etch virus (TEV) and is expressed by  
601 neurons throughout the CNS. Ligand binding to the receptor activates the pathway in postsynaptic  
602 neurons, resulting in recruitment of an Arrestin-TEV protease fusion protein and proteolytic cleavage  
603 of QF. QF can then translocate to the nucleus where it promotes transcription of genes downstream of  
604 the upstream activation sequence (QUAS) to which it binds. UAS and QUAS regulated reporters  
605 label pre- and postsynaptic neurons, respectively, with green and red fluorescent proteins. (b)  
606 Constructs containing modified ligand, receptor and arrestin-TEV components were cloned into Tol2  
607 transposition vectors. To confirm the presence of each *trans*-Tango component in injected embryos,  
608 secondary markers consisting of tissue- specific promoters driving different FPs that label the lens of  
609 the eye (*cryaa*) or hatching gland cells (*hel.1*) were included in each Tol2 plasmid.

610

611 Fig. 2: Gal4-dependent *trans*-Tango labeling of synaptic partners

612 Progeny from Gal4 driver lines mated to *Tg(QUAS:mApple-CAAX;hel.1:mCherry)* were injected with  
613 *trans*-Tango constructs and Tol2 mRNA at the 1-cell stage. Larvae positive for all secondary markers  
614 were imaged by confocal microscopy at 6 dpf. (a) *TgBAC(ptf1a-Gal4-VP16;UAS:GFP)* produced  
615 *mApple-CAAX* labeling of hindbrain and midbrain neurons (n= 932/1042). (b) *Tg(th:Gal4-*  
616 *VP16;UAS:GFP)* resulted in extensive labeling throughout the CNS (n= 548/656). (c) In  
617 *Tg(-17.6isl2b:Gal4-VP16;myl7:TagRFP;UAS:GFP)* larvae, mApple labeled neurons in the optic  
618 tectum (arrowhead; n= 223/297) were adjacent to GFP labeled axon terminals of presynaptic ganglion  
619 cells. Diffuse red fluorescent protein labeling (asterisk) is due to a secondary marker (*myl7:RFP*)

620 expressed in the heart. (a', b', c') Merged images with GFP channel. (d, e, f) mApple labeling was  
621 not observed after embryos were injected with only the receptor and arrestin constructs (n=25 for each  
622 driver). Scale bars, 50  $\mu$ m.

623 Fig. 3: Progression of *trans*-Tango labeling during neural development

624 Lateral views of GFP (pre-synaptic) and mApple-CAAX (post-synaptic) labeled neurons and axons in the  
625 ventral spinal cord of the same individual detected at (a) 1 (b) 3 and (c) 5 dpf. The larva contained  
626 *Tg(isl2b.2:Gal4; myl7:tagRFP); Tg(UAS:GFP); Tg(QUAS:mApple-CAAX;hel.1:mCherry)* and secondary  
627 reporters for all *trans*-Tango components. Additional mApple-CAAX labeled cells were detected over  
628 time (arrowheads). Uniquely identified commissural primary ascending (CoPA) interneuron, V2a  
629 interneuron and caudal primary motor neuron (CaP) were imaged at each timepoint but, at 1 dpf, the CaP  
630 motoneuron was not yet labeled. For each time point, n=10 larvae were examined. Scale bars, 50  $\mu$ m in  
631 upper panels and 100  $\mu$ m in lower panels.

632 Fig. 4: Validation of *trans*-Tango labeling in the retina

633 Co-labeled neurons in cryosections (20  $\mu$ m) of the retina from *TgBAC(ptf1a:Gal4-VP16); UAS:GFP*  
634 and *Tg(QUAS:mApple-CAAX)* larvae that had been injected with *trans*-Tango components at the 1-cell  
635 stage. (a,a') mApple labeled cell in the ganglion cell layer (GCL) with dendrites in the inner plexiform  
636 layer (IPL) shows (a'') HuC/D immunoreactivity (arrowhead). (b,b') mApple labeled amacrine cell in the  
637 inner nuclear layer (INL) with extensive processes in the IPL is also (b'') HuC/D positive (arrowhead).  
638 (c,c'') mApple labeled bipolar cells in the INL with dendrites in the outer plexiform layer (OPL) variably  
639 express protein kinase C alpha (PKCa) (arrowhead). The cone photoreceptor outer segments are visible  
640 due to autofluorescence (brackets). All retinal sections are shown with photoreceptors oriented at the top.  
641 Scale bars, 10  $\mu$ m.

642

643 Fig. 5. *trans*-Tango confirms predicted postsynaptic partners of retinal ganglion cells

644 (a,a') *Tg(isl2b.2:Gal4; myl7:tagRFP)* drives UAS:GFP in retinal ganglion cells that project to the optic  
645 tectum, where labeling from *Tg(QUAS:mApple-CAAX)* reveals their postsynaptic partners at 6 dpf. (b)  
646 Distinct morphology of non-stratified periventricular interneurons (nsPVN, n=46), (c) superficial

647 interneurons (SIN, n=11), (d) mono-stratified periventricular interneurons (msPVIN, n=67), (e-e')  
648 bistratified periventricular interneurons (bsPVIN, n=43) (f) periventricular projection neurons (PVPN,  
649 n=21), (g) tri-stratified periventricular interneurons (tsPVIN, n=72) and (h) a distinct subtype of  
650 periventricular projection neurons (PVPN, n=26) labeled by *trans*-Tango. In (a'-h'), individual neurons  
651 are reoriented with cell bodies anterior. Scale bars = 100  $\mu$ m. (i) Drawings corresponding to each  
652 neuronal cell type. (j-j') Occasionally, hindbrain neurons with long processes extending to the tectum are  
653 also detected (n=6/297). Scale bar 50  $\mu$ m in j' and 100  $\mu$ m in j''.

654

655 Figure 6. Functional validation of synaptic connectivity

656 *trans*-Tango signaling drives expression of any gene under QUAS control. (a,a'') In *Tg(isl2b.2:Gal4;*  
657 *myl7:tagRFP)*, *Tg(UAS:GFP)* and *Tg(QUAS:mApple-CAAX)* larvae that were injected with the  
658 QUAS:H2B-GCaMP6s plasmid, GCaMP6s labeled nuclei are only detected within mApple-CAAX  
659 labeled tectal neurons of *trans*-Tango positive larvae. (b-d) In larvae bearing all *trans*-Tango components,  
660 optogenetic activation of retinal ganglion cells expressing In larvae bearing all *trans*Tango components,  
661 optogenetic activation of retinal ganglion cells expressing ReaChR with 561 nm light activates GCaMP6s  
662 in tectal neurons. (b) Graphical representation showing 5-fold increase in calcium transients in  
663 *Tg(UAS:ReaChR-Tag-RFPT)* larvae compared to siblings lacking this transgene (p = 0.0043). (c-d) Mean  
664 and standard deviation of  $\Delta F/F$  for GCaMP6s positive tectal neurons in (c) ReaChR negative controls  
665 (n=15) compared to (d) ReaChR positive larvae (n=21) in response to 561 nm of light. (e,e') *trans*-Tango-  
666 mediated ablation of postsynaptic neurons. In 5 dpf *TgBAC(ptf1a:Gal4-VPI6)<sup>jh16</sup>; UAS:GFP* larvae  
667 expressing the bacterial *NfsB* reductase gene, mApple-CAAX neurons (arrowheads) were no longer  
668 detected (f,f') following 1 day of incubation in 10  $\mu$ M Metronidazole (n= 25). Scale bars, 50  $\mu$ m.

669



670

## 671 References

672

- 673 1. Glickstein, M. Golgi and Cajal: The neuron doctrine and the 100th anniversary of the 1906 Nobel Prize. *Curr Biol* **16**, R147-151  
674 (2006).
- 675 2. Luo, L., Callaway, E.M. & Svoboda, K. Genetic Dissection of Neural Circuits: A Decade of Progress. *Neuron* **98**, 865 (2018).
- 676 3. Wickersham, I.R., Finke, S., Conzelmann, K.K. & Callaway, E.M. Retrograde neuronal tracing with a deletion-mutant rabies virus.  
677 *Nat Methods* **4**, 47-49 (2007).
- 678 4. Callaway, E.M. & Luo, L. Monosynaptic Circuit Tracing with Glycoprotein-Deleted Rabies Viruses. *J Neurosci* **35**, 8979-8985  
679 (2015).
- 680 5. Beier, K.T., Mundell, N.A., Pan, Y.A. & Cepko, C.L. Anterograde or Retrograde Transsynaptic Circuit Tracing in Vertebrates with  
681 Vesicular Stomatitis Virus Vectors. *Curr Protoc Neurosci* **74**, 1.26.21-21.26.27 (2016).
- 682 6. Lichtman, J.W. & Denk, W. The big and the small: challenges of imaging the brain's circuits. *Science* **334**, 618-623 (2011).
- 683 7. Talay, M. et al. Transsynaptic Mapping of Second-Order Taste Neurons in Flies by trans-Tango. *Neuron* **96**, 783-795.e784 (2017).
- 684 8. Chen, Y.D., Park, S.J., Joseph, R.M., Ja, W.W. & Dahanukar, A.A. Combinatorial Pharyngeal Taste Coding for Feeding Avoidance in  
685 Adult Drosophila. *Cell Rep* **29**, 961-973.e964 (2019).
- 686 9. Duhart, J.M., Baccini, V., Zhang, Y., Machado, D.R. & Koh, K. Modulation of sleep-courtship balance by nutritional status in. *Elife* **9**  
687 (2020).
- 688 10. Reinhard, N. et al. The Neuronal Circuit of the Dorsal Circadian Clock Neurons in. *Front Physiol* **13**, 886432 (2022).
- 689 11. Sancer, G. et al. Modality-Specific Circuits for Skylight Orientation in the Fly Visual System. *Curr Biol* **29**, 2812-2825.e2814 (2019).
- 690 12. Snell, N.J. et al. Complex representation of taste quality by second-order gustatory neurons in Drosophila. *Curr Biol* **32**, 3758-  
691 3772.e3754 (2022).
- 692 13. Barnea, G. et al. The genetic design of signaling cascades to record receptor activation. *Proc Natl Acad Sci U S A* **105**, 64-69 (2008).
- 693 14. Halpern, M.E. et al. Gal4/UAS transgenic tools and their application to zebrafish. *Zebrafish* **5**, 97-110 (2008).
- 694 15. Subedi, A. et al. Adoption of the Q transcriptional regulatory system for zebrafish transgenesis. *Methods* **66**, 433-440 (2014).
- 695 16. Kawakami, K. Tol2: a versatile gene transfer vector in vertebrates. *Genome Biol* **8 Suppl 1**, S7 (2007).
- 696 17. Akitake, C.M., Macurak, M., Halpern, M.E. & Goll, M.G. Transgenerational analysis of transcriptional silencing in zebrafish. *Dev*  
697 *Biol* **352**, 191-201 (2011).
- 698 18. Park, H.C. et al. Analysis of upstream elements in the HuC promoter leads to the establishment of transgenic zebrafish with  
699 fluorescent neurons. *Dev Biol* **227**, 279-293 (2000).
- 700 19. Xie, X. et al. Silencer-delimited transgenesis: NRSE/RE1 sequences promote neural-specific transgene expression in a NRSF/REST-  
701 dependent manner. *BMC Biol* **10**, 93 (2012).
- 702 20. Pisharath, H., Rhee, J.M., Swanson, M.A., Leach, S.D. & Parsons, M.J. Targeted ablation of beta cells in the embryonic zebrafish  
703 pancreas using E. coli nitroreductase. *Mech Dev* **124**, 218-229 (2007).
- 704 21. Hoshino, M. et al. Ptf1a, a bHLH transcriptional gene, defines GABAergic neuronal fates in cerebellum. *Neuron* **47**, 201-213 (2005).
- 705 22. Sternberg, J.R. et al. Optimization of a Neurotoxin to Investigate the Contribution of Excitatory Interneurons to Speed Modulation  
706 In Vivo. *Curr Biol* **26**, 2319-2328 (2016).
- 707 23. Itoh, T. et al. Gsx2 is required for specification of neurons in the inferior olivary nuclei from Ptf1a-expressing neural progenitors in  
708 zebrafish. *Development* **147** (2020).
- 709 24. Jusuf, P.R. & Harris, W.A. Ptf1a is expressed transiently in all types of amacrine cells in the embryonic zebrafish retina. *Neural Dev*  
710 **4**, 34 (2009).
- 711 25. Davison, C. & Zolessi, F.R. Slit2 is necessary for optic axon organization in the zebrafish ventral midline. *Cells Dev* **166**, 203677  
712 (2021).
- 713 26. Ryu, S. et al. Orthopedia homeodomain protein is essential for diencephalic dopaminergic neuron development. *Curr Biol* **17**, 873-880  
714 (2007).
- 715 27. Pittman, A.J., Law, M.Y. & Chien, C.B. Pathfinding in a large vertebrate axon tract: isotypic interactions guide retinotectal axons at  
716 multiple choice points. *Development* **135**, 2865-2871 (2008).
- 717 28. Tokumoto, M. et al. Molecular heterogeneity among primary motoneurons and within myotomes revealed by the differential mRNA  
718 expression of novel islet-1 homologs in embryonic zebrafish. *Dev Biol* **171**, 578-589 (1995).
- 719 29. Thisse, B. et al. Spatial and temporal expression of the zebrafish genome by large-scale in situ hybridization screening. *Methods Cell*  
720 *Biol* **77**, 505-519 (2004).
- 721 30. Knafo, S. et al. Mechanosensory neurons control the timing of spinal microcircuit selection during locomotion. *Elife* **6** (2017).
- 722 31. Knafo, S. & Wyart, C. Active mechanosensory feedback during locomotion in the zebrafish spinal cord. *Curr Opin Neurobiol* **52**, 48-  
723 53 (2018).
- 724 32. Zheng, Y.Q. et al. Nexmifa Regulates Axon Morphogenesis in Motor Neurons in Zebrafish. *Front Mol Neurosci* **15**, 848257 (2022).
- 725 33. Hoon, M., Okawa, H., Della Santina, L. & Wong, R.O. Functional architecture of the retina: development and disease. *Prog Retin Eye*  
726 *Res* **42**, 44-84 (2014).
- 727 34. Nevin, L.M., Robles, E., Baier, H. & Scott, E.K. Focusing on optic tectum circuitry through the lens of genetics. *BMC Biol* **8**, 126  
728 (2010).
- 729 35. Förster, D. et al. Retinotectal circuitry of larval zebrafish is adapted to detection and pursuit of prey. *Elife* **9** (2020).
- 730 36. Scott, E.K. & Baier, H. The cellular architecture of the larval zebrafish tectum, as revealed by gal4 enhancer trap lines. *Front Neural*  
731 *Circuits* **3**, 13 (2009).
- 732 37. Freeman, J. et al. Mapping brain activity at scale with cluster computing. *Nat Methods* **11**, 941-950 (2014).
- 733 38. Wee, C.L. et al. A bidirectional network for appetite control in larval zebrafish. *Elife* **8** (2019).
- 734 39. Helmbrecht, T.O., Dal Maschio, M., Donovan, J.C., Koutsouli, S. & Baier, H. Topography of a Visuomotor Transformation. *Neuron*  
735 **100**, 1429-1445.e1424 (2018).

- 736 40. Sharrock, A.V. et al. NTR 2.0: a rationally engineered prodrug-converting enzyme with substantially enhanced efficacy for targeted  
737 cell ablation. *Nat Methods* **19**, 205-215 (2022).
- 738 41. Ahrens, M.B. et al. Brain-wide neuronal dynamics during motor adaptation in zebrafish. *Nature* **485**, 471-477 (2012).
- 739 42. Muto, A., Ohkura, M., Abe, G., Nakai, J. & Kawakami, K. Real-time visualization of neuronal activity during perception. *Curr Biol*  
740 **23**, 307-311 (2013).
- 741 43. Antinucci, P. et al. A calibrated optogenetic toolbox of stable zebrafish opsin lines. *Elife* **9** (2020).
- 742 44. Ma, M., Kler, S. & Pan, Y.A. Structural Neural Connectivity Analysis in Zebrafish With Restricted Anterograde Transneuronal Viral  
743 Labeling and Quantitative Brain Mapping. *Front Neural Circuits* **13**, 85 (2019).
- 744 45. Satou, C. et al. A viral toolbox for conditional and transneuronal gene expression in zebrafish. *Elife* **11** (2022).
- 745 46. Asakawa, K. et al. Genetic dissection of neural circuits by Tol2 transposon-mediated Gal4 gene and enhancer trapping in zebrafish.  
746 *Proc Natl Acad Sci U S A* **105**, 1255-1260 (2008).
- 747 47. Bergeron, S.A. et al. Brain selective transgene expression in zebrafish using an NRSE derived motif. *Front Neural Circuits* **6**, 110  
748 (2012).
- 749 48. Distel, M., Wullmann, M.F. & Köster, R.W. Optimized Gal4 genetics for permanent gene expression mapping in zebrafish. *Proc Natl*  
750 *Acad Sci U S A* **106**, 13365-13370 (2009).
- 751 49. Kawakami, K. et al. zTrap: zebrafish gene trap and enhancer trap database. *BMC Dev Biol* **10**, 105 (2010).
- 752 50. Marquart, G.D. et al. A 3D Searchable Database of Transgenic Zebrafish Gal4 and Cre Lines for Functional Neuroanatomy Studies.  
753 *Front Neural Circuits* **9**, 78 (2015).
- 754 51. Goll, M.G., Anderson, R., Stainier, D.Y., Spradling, A.C. & Halpern, M.E. Transcriptional silencing and reactivation in transgenic  
755 zebrafish. *Genetics* **182**, 747-755 (2009).
- 756 52. Pang, S.C., Wang, H.P., Zhu, Z.Y. & Sun, Y.H. Transcriptional Activity and DNA Methylation Dynamics of the Gal4/UAS System in  
757 Zebrafish. *Mar Biotechnol (NY)* **17**, 593-603 (2015).
- 758 53. Baier, H. & Wullmann, M.F. Anatomy and function of retinorecipient arborization fields in zebrafish. *J Comp Neurol* **529**, 3454-3476  
759 (2021).
- 760 54. Del Bene, F. & Wyart, C. Optogenetics: a new enlightenment age for zebrafish neurobiology. *Dev Neurobiol* **72**, 404-414 (2012).
- 761 55. Robles, E., Smith, S.J. & Baier, H. Characterization of genetically targeted neuron types in the zebrafish optic tectum. *Front Neural*  
762 *Circuits* **5**, 1 (2011).
- 763 56. Ghosh, A. & Halpern, M.E. Transcriptional regulation using the Q system in transgenic zebrafish. *Methods Cell Biol* **135**, 205-218  
764 (2016).
- 765 57. Burgess, J. et al. An optimized QF-binary expression system for use in zebrafish. *Dev Biol* **465**, 144-156 (2020).
- 766 58. Fernandes, A.M. et al. Neural circuitry for stimulus selection in the zebrafish visual system. *Neuron* **109**, 805-822.e806 (2021).
- 767 59. Hong, J. et al. IQ-Switch is a QF-based innocuous, silencing-free, and inducible gene switch system in zebrafish. *Commun Biol* **4**,  
768 1405 (2021).
- 769 60. Sorkaç, A., Savva, Y.A., Savaş, D., Talay, M. & Barnea, G. Circuit analysis reveals a neural pathway for light avoidance in  
770 *Drosophila* larvae. *Nat Commun* **13**, 5274 (2022).
- 771 61. Walker, C. Haploid screens and gamma-ray mutagenesis. *Methods Cell Biol* **60**, 43-70 (1999).
- 772 62. Parsons, M.J. et al. Notch-responsive cells initiate the secondary transition in larval zebrafish pancreas. *Mech Dev* **126**, 898-912  
773 (2009).
- 774 63. Fernandes, A.M. et al. Deep brain photoreceptors control light-seeking behavior in zebrafish larvae. *Curr Biol* **22**, 2042-2047 (2012).
- 775 64. Ben Fredj, N. et al. Synaptic activity and activity-dependent competition regulates axon arbor maturation, growth arrest, and territory  
776 in the retinotectal projection. *J Neurosci* **30**, 10939-10951 (2010).
- 777 65. Kwan, K.M. et al. The Tol2kit: a multisite gateway-based construction kit for Tol2 transposon transgenesis constructs. *Dev Dyn* **236**,  
778 3088-3099 (2007).
- 779 66. Horstick, E.J. et al. Increased functional protein expression using nucleotide sequence features enriched in highly expressed genes in  
780 zebrafish. *Nucleic Acids Res* **43**, e48 (2015).
- 781 67. Suster, M.L., Abe, G., Schouw, A. & Kawakami, K. Transposon-mediated BAC transgenesis in zebrafish. *Nat Protoc* **6**, 1998-2021  
782 (2011).
- 783 68. Schindelin, J. et al. Fiji: an open-source platform for biological-image analysis. *Nat Methods* **9**, 676-682 (2012).
- 784 69. Marquart, G.D. et al. High-precision registration between zebrafish brain atlases using symmetric diffeomorphic normalization.  
785 *Gigascience* **6**, 1-15 (2017).
- 786

1 **Figure Legends**

2

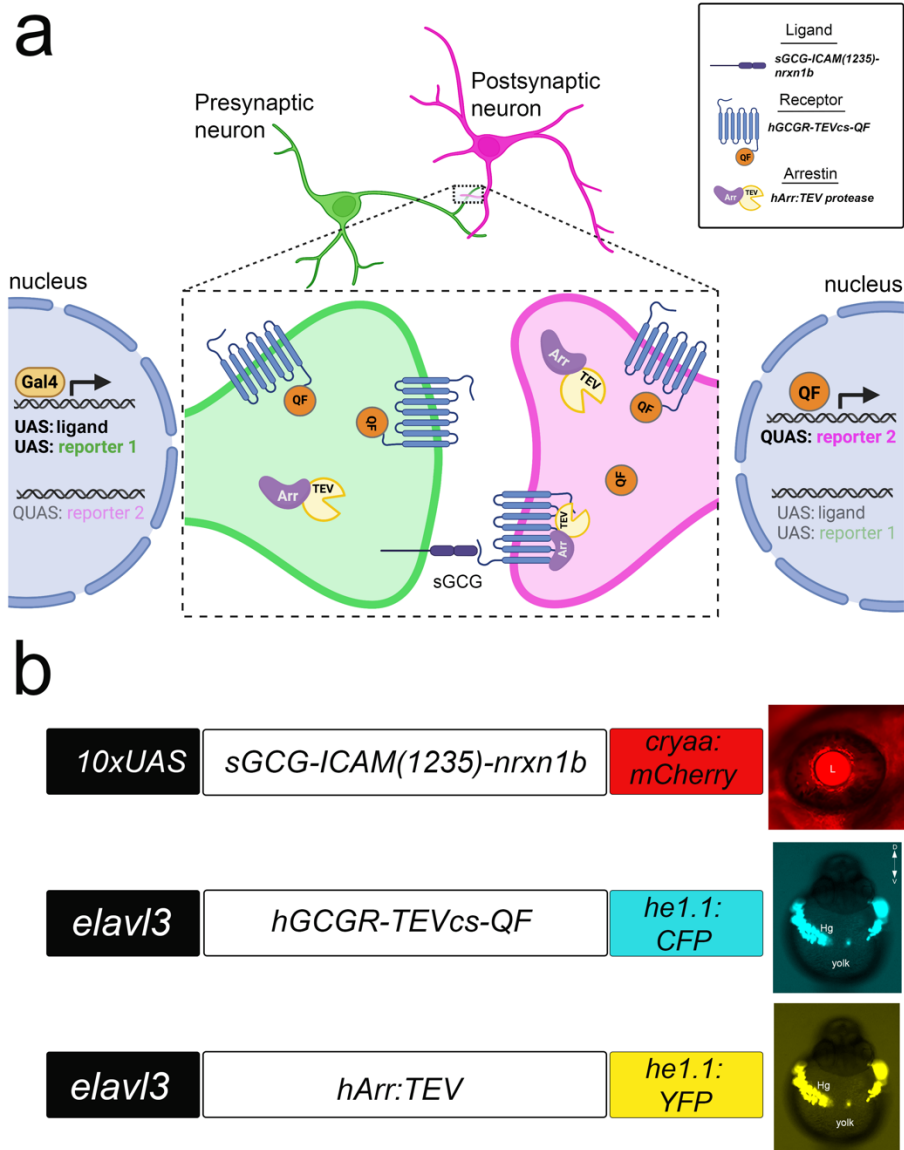

3

4 Fig. 1: *trans*-Tango mediates transsynaptic signaling in zebrafish

5 (a) Gal4 driver lines direct ligand expression in presynaptic neurons of interest. Ligand derived from  
6 human glucagon (sGCG) is tethered to the presynaptic membrane through the transmembrane domain of  
7 zebrafish Nrnx1b and extended into the synaptic cleft through the ICAM(1235) linker sequence (Talay et  
8 al., 2017). The receptor (hGCGR) is fused to the QF transcription factor through the protease cleavage  
9 site (cs) of the N1a protease from the tobacco etch virus (TEV) and is expressed by neurons throughout

10 the CNS. Ligand binding to the receptor activates the pathway in postsynaptic neurons, resulting in  
11 recruitment of an Arrestin-TEV protease fusion protein and proteolytic cleavage of QF. QF can then  
12 translocate to the nucleus where it promotes transcription of genes downstream of the upstream activation  
13 sequence (QUAS) to which it binds. UAS and QUAS regulated reporters label pre- and postsynaptic  
14 neurons, respectively, with green and red fluorescent proteins. (b) Constructs containing modified ligand,  
15 receptor and arrestin-TEV components were cloned into Tol2 transposition vectors. To confirm the  
16 presence of each *trans*-Tango component in injected embryos, secondary markers consisting of tissue-  
17 specific promoters driving different FPs that label the lens of the eye (*cryaa*) or hatching gland cells  
18 (*hel.1*) were included in each Tol2 plasmid.

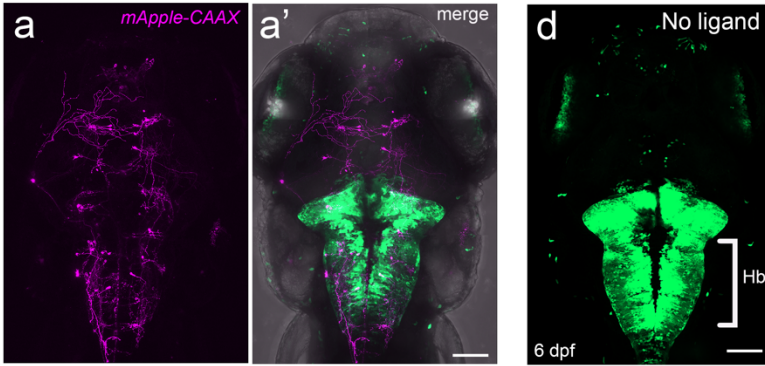

*TgBAC(pt1fa:Gal4-VP16; UAS:GFP); Tg(QUAS:mApple-CAAX)*

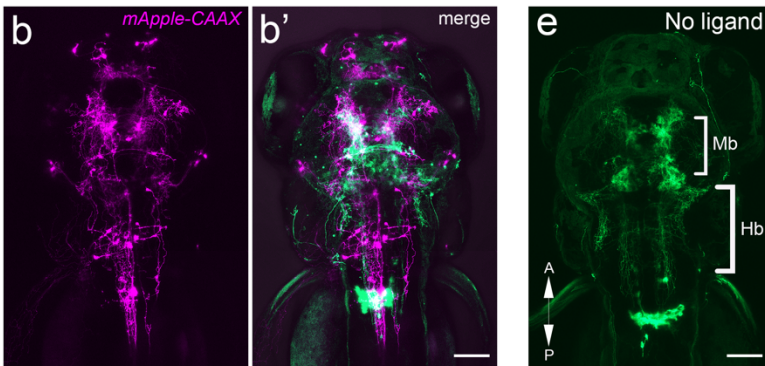

*Tg(th:Gal4-VP16; UAS:GFP); Tg(QUAS:mApple-CAAX)*

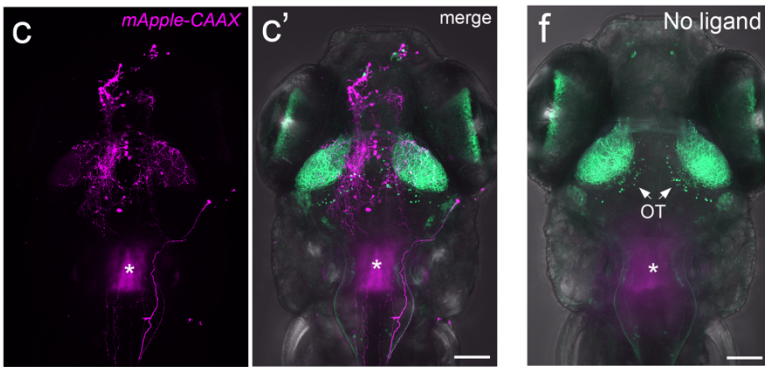

*Tg(isl2b.2:Gal4; myl7:TagRFP); Tg(UAS:GFP); Tg(QUAS:mApple-CAAX)*

19

20 Fig. 2: Gal4-dependent *trans*-Tango labeling of synaptic partners

21 Progeny from Gal4 driver lines mated to *Tg(QUAS:mApple-CAAX;hel.1:mCherry)* were injected with  
22 *trans*-Tango constructs and Tol2 mRNA at the 1-cell stage. Larvae positive for all secondary markers  
23 were imaged by confocal microscopy at 6 dpf. (a) *TgBAC(ptf1a-Gal4-VP16;UAS:GFP)* produced  
24 *mApple-CAAX* labeling of hindbrain and midbrain neurons (n= 932/1042). (b) *Tg(th:Gal4-*

25 *VP16;UAS:GFP*) resulted in extensive labeling throughout the CNS (n= 548/656). (c) In  
26 *Tg(-17.6isl2b:Gal4-VP16;myl7:TagRFP;UAS:GFP)* larvae, mApple labeled neurons in the optic tectum  
27 (arrowhead; n= 223/297) were adjacent to GFP labeled axon terminals of presynaptic ganglion cells.  
28 Diffuse red fluorescent protein labeling (asterisk) is due to a secondary marker (*myl7:RFP*) expressed in  
29 the heart. (a', b', c') Merged images with GFP channel. (d, e, f) mApple labeling was not observed after  
30 embryos were injected with only the receptor and arrestin constructs (n=25 for each driver). Scale bars, 50  
31  $\mu\text{m}$ .

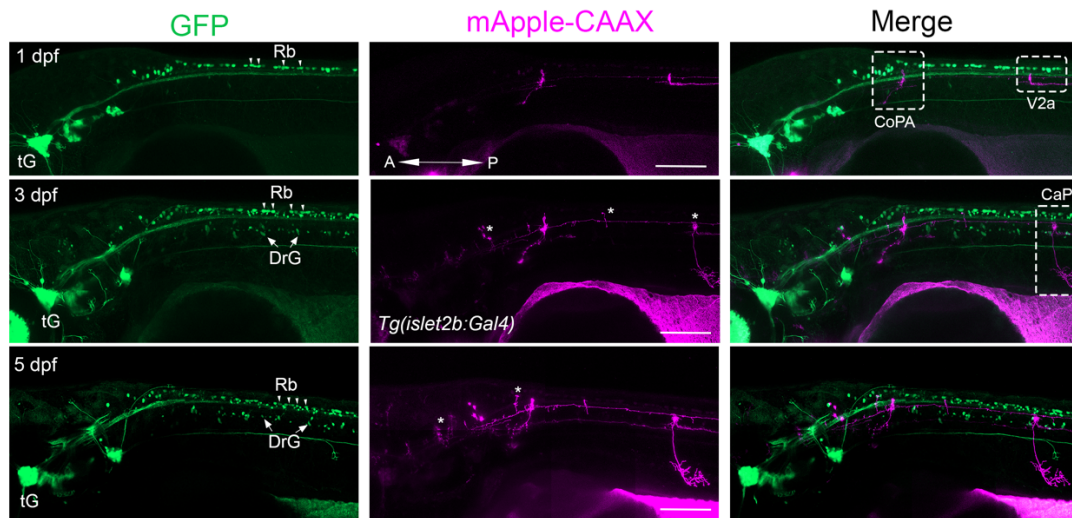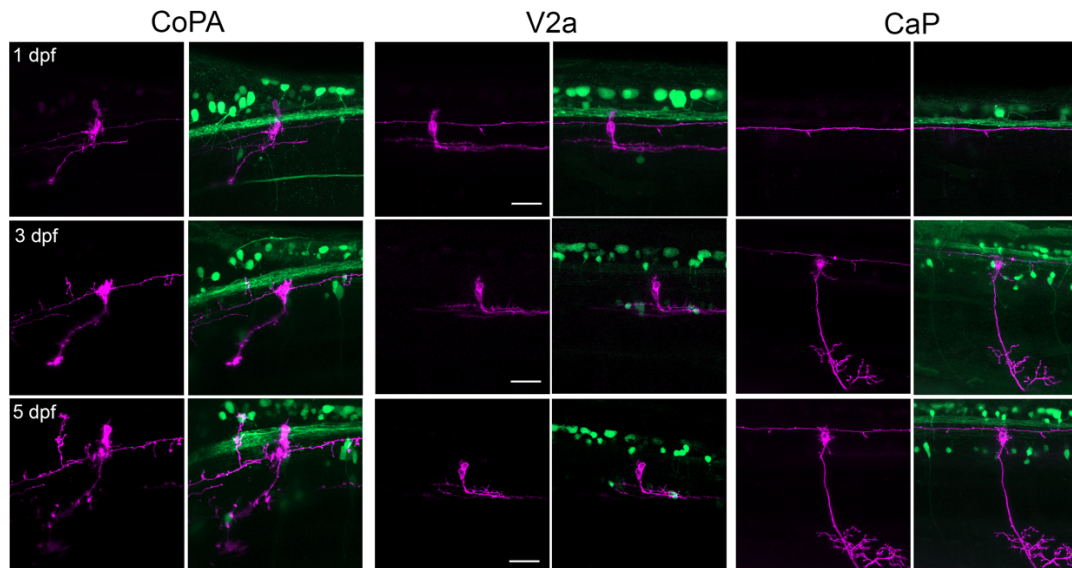

33 Fig. 3: Progression of *trans*-Tango labeling during neural development  
34 Lateral views of GFP (pre-synaptic) and mApple-CAAX (post-synaptic) labeled neurons and axons in the  
35 ventral spinal cord of the same individual detected at (a) 1 (b) 3 and (c) 5 dpf. The larva contained  
36 *Tg(isl2b.2:Gal4; myl7:tagRFP); Tg(UAS:GFP); Tg(QUAS:mApple-CAAX;he1.1:mCherry)* and secondary  
37 reporters for all *trans*-Tango components. Additional mApple-CAAX labeled cells were detected over  
38 time (arrowheads). Uniquely identified commissural primary ascending (CoPA) interneuron, V2a  
39 interneuron and caudal primary motor neuron (CaP) were imaged at each timepoint but, at 1 dpf, the CaP  
40 motoneuron was not yet labeled. For each time point, n=10 larvae were examined. Scale bars, 50  $\mu$ m in  
41 upper panels and 100  $\mu$ m in lower panels.

42

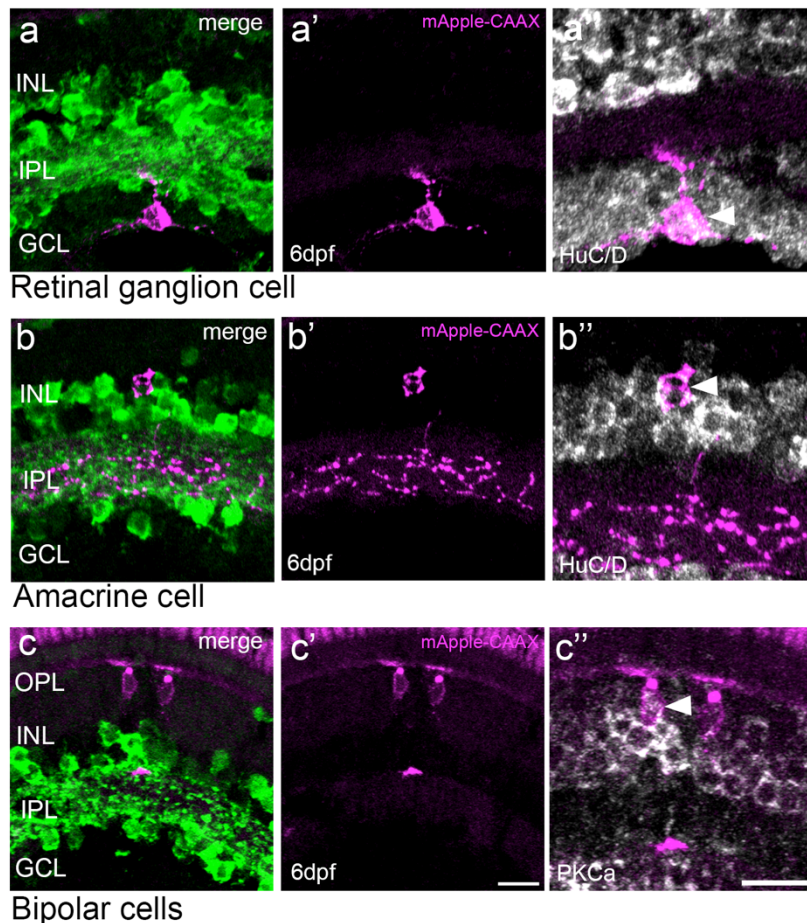

43

44 Fig. 4: Validation of *trans*-Tango labeling in the retina

45 Co-labeled neurons in cryosections (20  $\mu$ m) of the retina from *TgBAC(ptf1a:Gal4-VP16); UAS:GFP)*

46 and *Tg(QUAS:mApple-CAAX)* larvae that had been injected with *trans*-Tango components at the 1-cell

47 stage. (a,a') mApple labeled cell in the ganglion cell layer (GCL) with dendrites in the inner plexiform  
48 layer (IPL) shows (a'') HuC/D immunoreactivity (arrowhead). (b,b') mApple labeled amacrine cell in the  
49 inner nuclear layer (INL) with extensive processes in the IPL is also (b'') HuC/D positive (arrowhead).  
50 (c,c'') mApple labeled bipolar cells in the INL with dendrites in the outer plexiform layer (OPL) variably  
51 express protein kinase C alpha (PKCa) (arrowhead). The cone photoreceptor outer segments are visible  
52 due to autofluorescence (brackets). All retinal sections are shown with photoreceptors oriented at the top.  
53 Scale bars, 10  $\mu$ m.



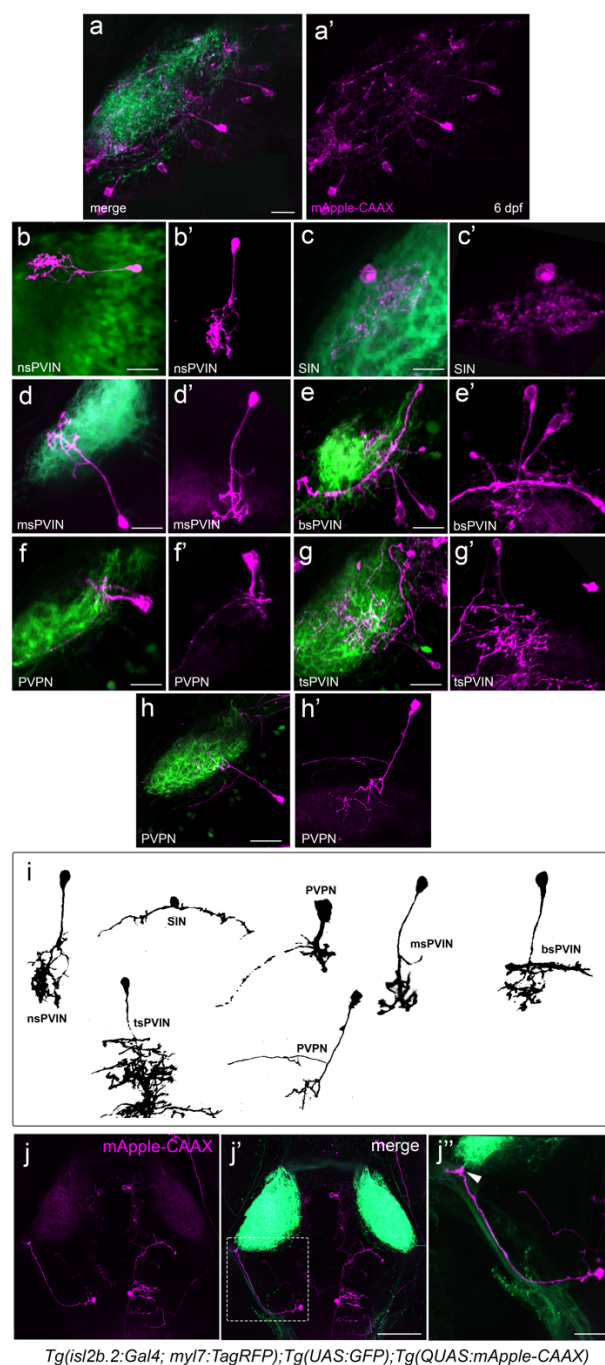

*Tg(isl2b.2:Gal4; myl7:TagRFP);Tg(UAS:GFP);Tg(QUAS:mApple-CAAX)*

54

55 Fig. 5. *trans*-Tango confirms predicted postsynaptic partners of retinal ganglion cells

56 (a,a') *Tg(isl2b.2:Gal4; myl7:tagRFP)* drives UAS:GFP in retinal ganglion cells that project to the optic

57 tectum, where labeling from *Tg(QUAS:mApple-CAAX)* reveals their postsynaptic partners at 6 dpf. (b)

58 Distinct morphology of non-stratified periventricular interneurons (nsPVIN, n=46), (c) superficial

59 interneurons (SIN, n=11), (d) mono-stratified periventricular interneurons (msPVIN, n=67), (e-e')

60 bistratified periventricular interneurons (bsPVIN, n=43) (f) periventricular projection neurons (PVPN,  
 61 n=21), (g) tri-stratified periventricular interneurons (tsPVIN, n=72) and (h) a distinct subtype of  
 62 periventricular projection neurons (PVPN, n=26) labeled by *trans*-Tango. In (a'-h'), individual neurons  
 63 are reoriented with cell bodies anterior. Scale bars = 100  $\mu$ m. (i) Drawings corresponding to each  
 64 neuronal cell type. (j-j') Occasionally, hindbrain neurons with long processes extending to the tectum are  
 65 also detected (n=6/297). Scale bar 50  $\mu$ m in j' and 100  $\mu$ m in j''.

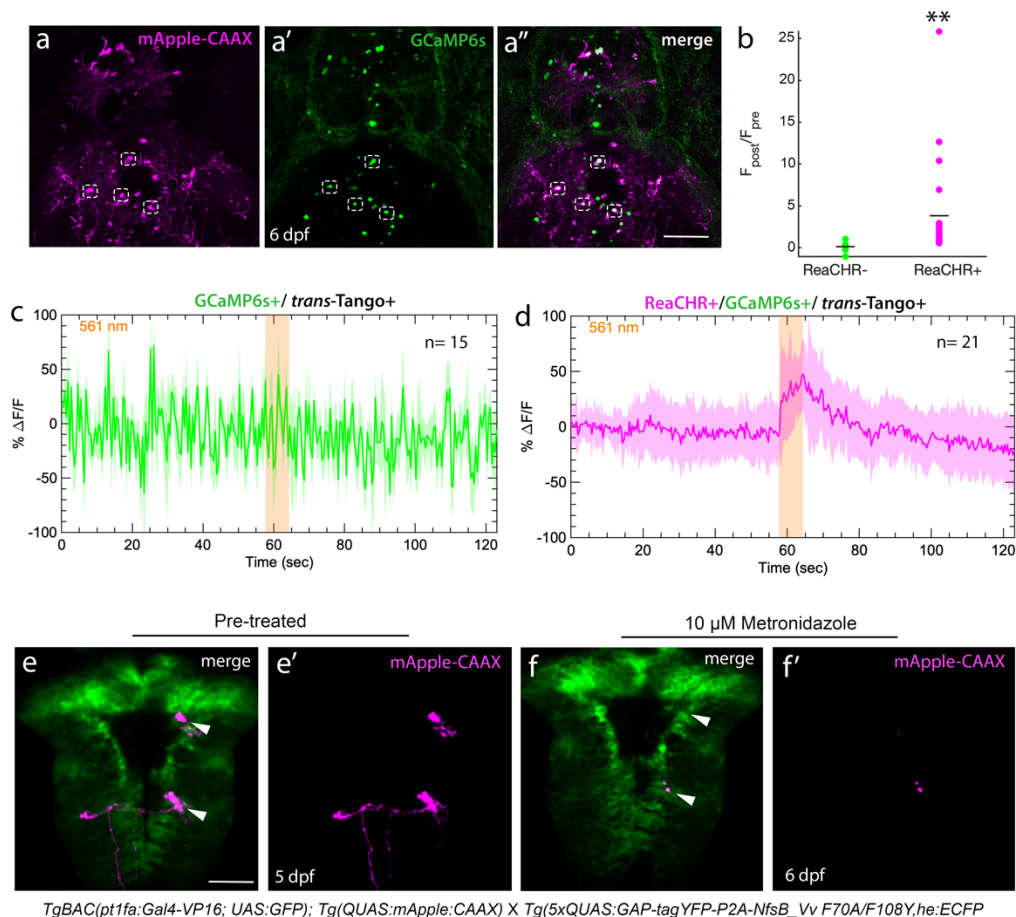

66

67 Figure 6. Functional validation of synaptic connectivity

68 *trans*-Tango signaling drives expression of any gene under QUAS control. (a,a'') In *Tg(isl2b.2:Gal4*;

69 *myl7:tagRFP)*, *Tg(UAS:GFP)* and *Tg(QUAS:mApple-CAAX)* larvae that were injected with the

70 QUAS:H2B-GCaMP6s plasmid, GCaMP6s labeled nuclei are only detected within mApple-CAAX

71 labeled tectal neurons of *trans*-Tango positive larvae. (b-d) In larvae bearing all *trans*-Tango components,

72 optogenetic activation of retinal ganglion cells expressing In larvae bearing all *trans*Tango components,  
73 optogenetic activation of retinal ganglion cells expressing ReaChR with 561 nm light activates GCaMP6s  
74 in tectal neurons. (b) Graphical representation showing 5-fold increase in calcium transients in  
75 *Tg(UAS:ReaChR-Tag-RFPT)* larvae compared to siblings lacking this transgene ( $p = 0.0043$ ). (c-d) Mean  
76 and standard deviation of  $\Delta F/F$  for GCaMP6s positive tectal neurons in (c) ReaChR negative controls  
77 ( $n=15$ ) compared to (d) ReaChR positive larvae ( $n=21$ ) in response to 561 nm of light. (e,e') *trans*-Tango-  
78 mediated ablation of postsynaptic neurons. In 5 dpf *TgBAC(ptf1a:Gal4-VP16)<sup>jh16</sup>; UAS:GFP* larvae  
79 expressing the bacterial *NfsB* reductase gene, mApple-CAAX neurons (arrowheads) were no longer  
80 detected (f,f') following 1 day of incubation in 10  $\mu$ M Metronidazole ( $n= 25$ ). Scale bars, 50  $\mu$ m.

81

82
